1       **INTERCELLULAR COMMUNICATION VIA THE *COMX*-INDUCING**  
2                   **PEPTIDE (*XIP*) OF *STREPTOCOCCUS MUTANS***

3  
4           Justin Kaspar<sup>1</sup>, Simon A. M. Underhill<sup>2</sup>, Robert C. Shields<sup>1</sup>, Adrian Reyes<sup>1</sup>, Suzanne  
5                   Rosenzweig<sup>2</sup>, Stephen J. Hagen<sup>2</sup>, and Robert A. Burne<sup>1#</sup>

6  
7       <sup>1</sup>Department of Oral Biology, University of Florida, Gainesville, Florida 32610

8       <sup>2</sup>Department of Physics, University of Florida, Gainesville, Florida 32611-8440

9  
10  
11   Running title: Competence signaling in biofilms

12   Keywords: dental caries, genetic competence, biofilms, ComX/SigX, stress response

13  
14   # Corresponding author.

15   Mailing address: Department of Oral Biology, University of Florida, College of Dentistry,

16   P.O. Box 100424, Gainesville, FL 32610.

17   Phone: (352) 273-8850

18   Fax: (352) 273-8829

19   E-mail: [rburne@dental.ufl.edu](mailto:rburne@dental.ufl.edu)

20

21 **ABSTRACT**

22 Gram-positive bacteria utilize exported peptides to coordinate genetic and physiological  
23 processes required for biofilm formation, stress responses and ecological competitiveness. One  
24 example is activation of natural genetic competence by ComR and the *comX*-inducing peptide  
25 (XIP) in *Streptococcus mutans*. Although the competence pathway can be activated by addition  
26 of synthetic XIP in defined medium, the hypothesis that XIP is able to function as an intercellular  
27 signal molecule has not been rigorously tested. Co-culture model systems were developed that  
28 included a “sender” strain that overexpressed the XIP precursor (ComS) and a “responder”  
29 strain harboring a GFP reporter fusion to a ComR-activated gene (*comX*) promoter. The ability  
30 of the sender strain to provide a signal to activate GFP expression was monitored at the  
31 individual cell and population levels using i) planktonic culture systems, ii) cells suspended in an  
32 agarose matrix or iii) cells growing in biofilms. XIP was shown to be freely diffusible and XIP  
33 signaling between the *S. mutans* sender and responder strains did not require cell-to-cell  
34 contact. The presence of a sucrose-derived exopolysaccharide matrix diminished the efficiency  
35 of XIP signaling in biofilms, possibly by affecting spatial distribution of XIP senders and potential  
36 responders. Intercellular signaling was greatly impaired in a strain lacking the primary autolysin,  
37 AtlA, and was substantially greater when the sender strain underwent lysis. Collectively, these  
38 data provide evidence that *S. mutans* XIP can indeed function as a peptide signal between cells  
39 and highlight the importance of studying signaling with endogenously-produced peptide(s) in  
40 populations in various environments and physiologic states.

41

42 **IMPORTANCE**

43           The *comX*-inducing peptide (XIP) of *Streptococcus mutans* is a key regulatory element  
44 in the activation of genetic competence, which allows cells to take up extracellular DNA. XIP has  
45 been found in cell culture fluids and addition of synthetic XIP to physiologically receptive cells  
46 can robustly induce competence gene expression. However, there is a lack of consensus as to  
47 whether XIP can function as an intercellular communication signal. Here, we show that XIP  
48 indeed signals between cells in *S. mutans*, but that cell lysis may be a critical factor, as opposed  
49 to a dedicated secretion/processing system, in allowing for release of XIP into the environment.  
50 The results have important implications in the context of the ecology, virulence and evolution of  
51 a ubiquitous human pathogen and related organisms.

52

## 53 INTRODUCTION

54 Evidence for extensive complexity and diversity in bacterial intercellular communication  
55 strategies has rapidly accumulated since quorum sensing was first described by Greenberg and  
56 colleagues (1). The study of the genetics, biochemistry and ecology of interbacterial  
57 communication has yielded valuable insights into the molecular basis for the behaviors of  
58 bacterial communities and has revealed novel pathways that can be targeted to disrupt the  
59 formation, persistence and pathogenic potential of biofilms (2). Because bacterial biofilm  
60 communities exist at relatively high cell densities and are typically rich in exopolymeric  
61 materials, mass transport limitations contribute to the development of considerable spatial  
62 heterogeneity. Despite this heterogeneity, biofilm communities coordinate population-wide  
63 responses when challenged with exogenous and endogenous stressors by employing  
64 intercellular communication pathways. In the well-characterized Gram-negative quorum sensing  
65 systems, cell-cell communication occurs primarily via N-acyl homoserine lactones (3), whereas  
66 Gram-positive bacteria communicate mainly via oligopeptides, often through two-component  
67 signal transduction systems (TCS) consisting minimally of a membrane-associated histidine  
68 kinase and a cytosolic response regulator (4). Alternatively, signaling may occur through a  
69 pathway that requires active internalization of a peptide, followed by specific binding of the  
70 peptide by a cytosolic transcriptional regulator (5). Genetic competence in Gram-positive  
71 bacteria is usually controlled by one of two peptide-based systems. The most thoroughly studied  
72 are similar to the ComCDE pathway of *Streptococcus pneumoniae*. ComC is the pro-peptide of  
73 competence stimulating peptide (CSP), which is processed and exported by a specialized  
74 secretion apparatus, then signals for the activation of competence genes via the ComDE TCS.  
75 The second is the more recently characterized ComRS pathway, which consists of the ComS  
76 precursor for *comX*-inducing peptide (XIP) and the cytosolic regulator ComR (6).

77 *Streptococcus mutans*, which colonizes the human oral cavity, is unusual among  
78 streptococci in that both CSP and XIP can activate transcription of the master regulator of

79 competence development, an alternative sigma factor encoded by the *sigX* ( $\sigma^X$ ) or *comX* (7–9)  
80 gene; SigX and ComX are homologues in different organisms. Thus, *S. mutans* has become an  
81 intriguing model for the study of peptide-based communication strategies (10). CSP in *S.*  
82 *mutans* is generated by processing and secretion of ComC through the ComAB exporter, with  
83 further processing by the SepM protease to yield the most active form (18-aa) of CSP (11). In a  
84 chemically-complex medium that is rich in peptides, such as brain heart infusion (BHI), CSP  
85 signaling occurs via ComDE and directly activates bacteriocin production. However, ComCDE  
86 of *S. mutans* are not true homologues of *S. pneumoniae* ComCDE, rather they are most similar  
87 in sequence and function to the BlpCRH system of the pneumococcus, with which *S. mutans*  
88 ComCDE share ancestral origin (6, 9). Provision of CSP to early exponential phase cells results  
89 in up-regulation of *comX* transcription through an as-yet-undefined indirect mechanism, and  
90 leads to a dramatic increase ( $\sim 10^3$ -fold) in efficiency of transformation. The second route for  
91 induction of competence in *S. mutans* involves the ComRS pathway, consisting of the Rgg-like  
92 transcriptional regulator ComR and XIP, the latter being a 7-aa peptide derived from the C-  
93 terminus of the 17-aa precursor, ComS. The current view of ComRS-dependent activation of  
94 *comX* in *S. mutans* is that the ribosomally translated ComS peptide is exported into the  
95 extracellular space and cleaved by a protease(s) to yield XIP (7, 9, 12), although the  
96 mechanisms for secretion or processing have not been identified. Notably, three independent  
97 research groups have detected XIP in supernatant fluids of *S. mutans* (13–15). In *Streptococcus*  
98 *thermophilus* (16), the Eep protease processes ComS to XIP, but an equivalent function for  
99 proteases in *S. mutans* with characteristics similar to Eep has not been demonstrated (13).  
100 Additionally, in *S. thermophilus*, the exported XIP appears to remain associated with the cell  
101 surface, as intercellular signaling by XIP in a co-culture system required cell-cell contact (16).  
102 The current model for how the ComRS-XIP system functions is that, after XIP is produced and  
103 released, it is transported back into the cell by the oligopeptide ABC transporter Opp (9). The re-  
104 imported XIP can then be specifically bound by ComR to form a dimeric ComR-XIP complex

105 that functions as a transcriptional activator of the promoters of *comX* and *comS* (17). The  
106 activation of *comS* creates a positive feedback loop that amplifies ComS and possibly XIP  
107 production (9, 17). The ComR-XIP complex recognizes a ComR-box consisting of a 20-bp  
108 palindromic motif with a conserved central GACA/TGTC inverted repeat (7, 18). The degree of  
109 conservation of the ComR-box with the consensus sequence has been correlated with levels of  
110 ComR-regulon expression (17).

111         Several different orthologs of ComR and ComS are present within streptococci (19).  
112 ComR, along with apparent orthologous proteins that include PlcR of *Bacillus thuringiensis* and  
113 PrgX of *Enterococcus faecalis*, are part of the RNPP superfamily (Rap/Npr/PlcR/PrgX) of  
114 transcriptional regulators that interact with pheromones in cell-cell signaling pathways. Rgg  
115 regulators typically contain an N-terminal helix-turn-helix (HTH) DNA-binding element and an  
116 approximately 220-aa C-terminal alpha-helical domain thought to be involved in binding of  
117 cognate small hydrophobic peptides (SHPs) (20). ComS peptides show substantial size and  
118 primary sequence variation between species of streptococci (21, 22). The so-called type I ComS  
119 peptides of *Streptococcus salivarius* and *S. thermophilus* harbor a P(F/Y)F motif and lack  
120 charged residues. The type II peptides, like ComS of *S. mutans*, along with the Pyogenes and  
121 Bovis groups of streptococci, contain a WW motif and basic and/or acidic residues (7, 17). In all  
122 streptococci that possess ComRS, *comS* is located immediately downstream of *comR*. The  
123 ComR-box upstream of *comS* is immediately followed by a “T-tract” that, in conjunction with the  
124 ComR-box palindrome, may function as a Rho-independent transcriptional terminator for *comR*  
125 (7, 17). All type II ComRS systems, including that of *S. mutans*, are located about 50 kbp from  
126 the origin of replication and are associated with clusters of genes involved in purine biosynthesis  
127 and the RuvB Holliday junction DNA helicase (7).

128         In the period since the ComRS system was first described by Gardan (23), Mashburn-  
129 Warren (7) and their co-workers, there has been minimal investigation into how XIP is released  
130 and whether it can actually function as an intercellular communication molecule for *S. mutans*

131 and related organisms. In this report, we designed and constructed an *S. mutans* co-culture  
132 system that allowed us to investigate intercellular ComRS signaling through observation of  
133 individual cells in planktonic cultures, in an agarose gel matrix and within single-species biofilm  
134 communities.  
135

## 136 RESULTS AND DISCUSSION

### 137 *Development of in vitro co-cultivation models to monitor XIP signaling.*

138 While numerous studies have used synthetic XIP peptide (sXIP) to explore the activation  
139 of the ComRS signaling pathway of *S. mutans* in planktonic cultures, little attention has been  
140 devoted to self-activation of the system, and only recently has sXIP-dependent gene activation  
141 been examined in *S. mutans* growing in biofilms (24), which is the normal growth mode of this  
142 organism in the oral cavity. Here, we developed a system to test whether the ComRS system  
143 can self-activate (intracellular) or cross-activate (intercellular) *comX* in the absence of  
144 exogenously supplied sXIP. Using previously described strains for our studies of genetic  
145 competence in *S. mutans* (25–27), we constructed a co-cultivation model consisting of two  
146 genetically modified *S. mutans*: a “sender” strain harboring a *comS* overexpressing plasmid  
147 (pIB184comS) along with a plasmid carrying the dsRed fluorescent protein (RFP) under the  
148 control of the *comX* promoter (*PcomX*), and a “responder” strain expressing GFP also under the  
149 control of *PcomX* (Figure 1A). The responder also carried the empty pIB184 vector so that the  
150 two strains were as genetically similar as possible. In certain cases, *comS* was deleted from the  
151 responder to remove any confounding effects of XIP production and auto-feedback by the  
152 responder strain. As structured, then, the sender constitutively expresses *comS* from the  $P_{23}$   
153 promoter on pIB184, overproducing the pro-peptide ComS and hence XIP. Intracellular  
154 signaling or self-activation could be monitored in the sender strain through RFP fluorescence;  
155 the sender strain was easily distinguished from the co-cultivated responder in microscopy  
156 images by its lack of green fluorescence in combination with its strong red fluorescence. If XIP  
157 can serve as an intercellular signal, the responder strain should then import the XIP from the  
158 sender strain using Opp, where it can complex with the ComR regulator and activate the *PcomX*  
159 promoter, resulting in production of GFP. Intercellular signaling can be visualized by  
160 fluorescence microscopy, by measuring total fluorescence in a plate reader or by flow cytometry  
161 of both planktonic cultures and/or dispersed biofilms.



162           The ability of the sender strain to activate *comX* in the responder strain, as measured by  
163 GFP production, was first examined with a plate reader-based assay. Mid-exponential phase  
164 planktonic cultures of both sender and responder strains were diluted 1:100 into fresh FMC  
165 medium, such that the sender strain was present in a ratio of 2.3:1 with the responder strain  
166 (Supplemental Figure 1), resulting in a final overall dilution in terms of absolute cell numbers of  
167 approximately 1:50. After 18 hours of growth, no detectable fluorescence was observed when  
168 wild-type (WT) *S. mutans* strain UA159 was co-cultivated with the *PcomX::gfp* responder strain  
169 (Figure 1B). In contrast, the *comS*-overexpressing strain, i.e. the sender, was able to elicit high  
170 expression of *PcomX::gfp* by the responder under similar growth conditions. To verify that  
171 *PcomX::gfp* expression was derived from imported extracellular XIP provided by the sender  
172 strain, we evaluated GFP fluorescence with two mutant backgrounds of the responder strain,  
173  $\Delta comS$  and  $\Delta opp$ . GFP fluorescence was still detectable in the responder strain lacking *comS*,  
174 albeit at a level 4-fold lower than in the strain with an intact *comS* gene. However, no GFP  
175 production was observed in the *opp* mutant of the responder strain. Both results were as  
176 expected: a lower level of fluorescence in a responder lacking *comS* would be unable to amplify  
177 *comX* expression through the internal positive feedback arising from the ComR-XIP complex  
178 activating the *comS* promoter, and XIP provided by the sender must be imported via Opp to  
179 activate *comX*. In terms of the sender strain, *PcomS* feedback via the RFP reporter was  
180 measured with the same intensity and timescale between all ComS-over production strains,  
181 suggesting that the observable responder differences were due to their genetic background  
182 alone (Figure 1C). Collectively, the results indicated that the sender was able provide a XIP  
183 signal to the responder and that *comX* was activated by this XIP signal, consistent with the  
184 current model for XIP-dependent activation of *comX* via active internalization by Opp,  
185 complexation with ComR, and signal amplification through activation of *comS* transcription.

186           To provide a rough estimate of the amount of XIP generated by the sender strain, we  
187 compared the fluorescence of the  $pB184ComS/UA159;PcomX::gfp/UA159$  co-cultivation results

188 to the fluorescence of cultures obtained by addition of various concentrations of sXIP to a mixed  
189 culture of UA159 and *PcomX::gfp*/UA159 at the same 2.3:1 ratio used in the previous  
190 experiment. From the measured fluorescence, it could be estimated that the amount of XIP  
191 provided by the *comS* over-expresser was between 37.5 and 50 nM (Figure 1D), which is  
192 similar to the concentration of XIP required to achieve ComRS-dependent activation of *comX* in  
193 other *S. mutans* UA159 derivatives in microfluidic and planktonic experiments (9). These data  
194 collectively show not only that intercellular signaling can occur via XIP and the ComRS pathway  
195 in *S. mutans*, but also that signaling can occur in the co-culture model at physiologically relevant  
196 levels of the peptide signal.

197

198 *XIP signaling does not require cell-cell contact.*

199 Early studies concluded that *S. mutans* XIP was a secreted, diffusible signal molecule  
200 (14). However, studies with *S. thermophilus* demonstrated that cell-cell contact was required for  
201 intercellular signaling by XIP (16). Since *S. mutans* and *S. thermophilus* are not closely related  
202 within the genus *Streptococcus* and evolved in very different environments, we tested whether  
203 the signaling observed in Figure 1 required cell-cell contact. Our initial test involved determining  
204 whether exposure of the responder strain to cell-free supernatant fluids derived from the sender  
205 strain could induce *comX* expression. Overnight cultures of either UA159 or the *comS*-  
206 overexpressing strain were grown in FMC medium. After pelleting the cells, the supernates were  
207 filter sterilized, the pH was adjusted to 7.0, and a concentrated solution of sterile glucose was  
208 added to provide an additional 20 mM glucose. Supernates from *S. mutans* UA159  
209 supplemented with 50 nM sXIP served as a positive control. The *PcomX::gfp*/UA159 responder  
210 was then suspended in the supernatant fluids and fluorescence was measured during growth of  
211 the cells. No fluorescence was observed from the responder strain grown in the supernates  
212 from UA159, unless sXIP was added (Figure 2A). However, when the *PcomX::gfp* responder  
213 strain was grown in supernates from the *comS*-overexpressing strain, robust fluorescence was

214 evident. These data clearly show that cell-free supernates of *S. mutans* are sufficient for  
215 intercellular signaling, albeit overexpression of *comS* was required to yield sufficient signal  
216 peptide in the supernates under the conditions tested.

217         Definitive evidence that the sender could produce a cell-free signal that could activate  
218 *comX* expression in the responder strain was obtained when the *comS*-overexpressing sender  
219 and *PcomX::gfp*/UA159 responder strains were cultured in separate chambers of a transwell  
220 apparatus (Figure 2B), with the strains separated by a 10  $\mu\text{m}$  thick, 0.4  $\mu\text{m}$  pore-size  
221 polycarbonate filter membrane. The membrane allows passage of small molecules and  
222 peptides, but prevents physical contact between cells in the different compartments. Addition of  
223 50 nM of sXIP to medium alone in the upper compartment activated *PcomX::gfp* expression in  
224 the lower compartment (Figure 2C). Consistent with the supernatant transfer experiments in  
225 Figure 2A, UA159 was unable to stimulate *comX* expression in the *PcomX::gfp* responder over  
226 the course of a 24-h incubation. In contrast, the *comS*-overexpressing strain in the top  
227 compartment of the transwell apparatus readily stimulated *comX* expression in the responder  
228 strain in the lower compartment. These experiments show that signaling occurs through the  
229 polycarbonate filter membrane and does not absolutely require contact, which suggests that XIP  
230 is released by the sender strain, is diffusible and that signaling can occur without direct contact  
231 between sender and responder strains of *S. mutans*.

232         In previous reports, the XIP peptide could be detected in supernatant fractions of the  
233 wild-type strain UA159 at a high cell density ( $\text{OD}_{600} = 1.0$ ) and cell supernates could also  
234 stimulate a *PcomX* reporter strain (14). In this study, we were not able to observe activation of  
235 the *PcomX::gfp* reporter by co-cultivation of strain UA159 or by using supernates from overnight  
236 cultures of *S. mutans* UA159. The discrepancy between these studies and ours could be due to  
237 the previously documented differences in XIP signaling seen between the chemically-defined  
238 media CDM (14) and FMC (28). In particular, XIP signaling is exquisitely sensitive to low pH  
239 (28, 29) and the drop of pH in FMC due to carbohydrate metabolism may be too rapid when

240 compared to that in CDM, since the latter is formulated with substantially greater (phosphate)  
241 buffer capacity. While levels of XIP in supernates from high-density, overnight cultures have  
242 been reported to be as high as 1  $\mu\text{M}$  (14), such levels are not required to activate *comX*  
243 transcription or induce genetic competence in early exponential phase cells when the pH is near  
244 neutrality (28, 29) (Figure 1C). In fact, later in the growth phase, when XIP concentrations in the  
245 medium may approach  $\mu\text{M}$  levels, the ComRS system may be inactive due to acidification of the  
246 environment. Instead, optimal signaling occurs at the threshold for *PcomX* activation and  
247 theoretically at lower cell densities, when the inhibitory effects of low pH generated by  
248 carbohydrate fermentation are minimized. Thus, the co-culture model that is presented here  
249 permits the study of competence signaling under conditions that may be more physiologically  
250 relevant.

251

#### 252 *XIP diffuses in an agarose matrix*

253 Oral biofilms, the natural habitat of *S. mutans*, are rich in exopolymeric material of  
254 bacterial and host origin. To verify that the XIP is able to diffuse freely in an aqueous  
255 environment containing *S. mutans*, we conducted a diffusion experiment using the  
256 *PcomX::gfp/ΔcomS* reporter strain grown in FMC medium and embedded in low-melting-point  
257 agarose/FMC medium. Cells were loaded into an IBIDI microslide channel (IBIDI GmbH) and  
258 allowed to attach to the channel surface. A 2% low-melting point agarose/FMC mixture was then  
259 injected into the channel to prevent advective transport of XIP and to immobilize the cells in the  
260 channel. sXIP, diluted in FMC to a final concentration of 1  $\mu\text{M}$ , was then deposited at one end of  
261 the channel with an equal volume of water deposited at the other end to balance the hydrostatic  
262 pressure along the length of the channel. Cells at different locations in the channel were then  
263 imaged by fluorescence microscopy at regular time intervals as the XIP diffused through the  
264 channel (Figure 3B-D). The diffusion coefficient of XIP was estimated by modeling the channel  
265 as one-dimensional with a concentrated XIP source at one end from which the peptide spreads

266 diffusively (that is, the cells produce no XIP and there is no hydrodynamic flow). GFP  
267 fluorescence versus time and spatial position was fit to a 1D diffusion equation (Figure 3A),  
268 leading to an estimate for the diffusion coefficient of XIP through FMC/agarose. The resulting  
269 estimate of  $1.8 \pm 0.3 \times 10^{-6} \text{ cm}^2/\text{s}$  was of the expected magnitude, based on the molecular mass  
270 of XIP and diffusion in an aqueous medium. These data, along with the transwell experiment  
271 presented in Figure 2, verify that XIP can signal by diffusion through aqueous medium,  
272 independently of cell-cell contact.

273

274 *Study of ComRS signaling between individual cells in an agarose matrix.*

275 To begin visualizing ComRS signaling at the single-cell level using a co-culture  
276 approach, we first mixed the *comS*-overexpressing sender with the responder, which carried  
277 *PcomX::gfp* in either the UA159 or  $\Delta comS$  genetic background, in liquid FMC when the cells  
278 reached an  $OD_{600} = 0.1$ . The mixture was loaded into a microfluidic channel, followed by  
279 injection of the 2% low-melting-point agarose/FMC mixture described above and in Figure 3.  
280 Both the sender and the responder were imaged at 1-h intervals for up to 5 h to monitor  
281 intercellular activation of *PcomX* via diffusion of XIP. Figure 4 plots the measured fluorescence  
282 of both RFP and GFP at the 2 h and 3 h time points. The scatter plots of individual cell  
283 fluorescence in the culture are shown for both a UA159-based responder (Figures 4A and 4E)  
284 and for a  $\Delta comS$  responder (Figures 4C and 4G). In both co-cultures, *PcomX::gfp* activation in  
285 the responders was not significantly different from baseline fluorescence of the wild-type strain  
286 UA159, which lacks a *gfp* reporter (data not shown). The experiment was repeated with a  
287 positive control in which  $1 \mu\text{M}$  sXIP was added into co-cultures containing responders with a  
288 UA159 (Figures 4B and 4F) or  $\Delta comS$  genetic background (Figures 4D and 4H). In this case,  
289 most cells produced either red fluorescence (senders) or green fluorescence (responders), but  
290 not both. This was observed for responders in the wild-type (Figure 4C) or  $\Delta comS$  (Figure 4E)  
291 genetic background. These data show that, in this experimental system, ComRS signaling from

292 the sender strain elicits a much weaker response from the responder than does the addition of  
293 synthetic XIP or was seen in the microtiter-based experiments detailed above. Since diffusion  
294 limitation cannot explain the results, we posited that the differences between this experiment  
295 and those described above could arise from a number of different factors that include a shorter  
296 experimental duration, a greater average distance between sender and responder cells in the  
297 agarose matrix than in the co-culture studies, more limited lysis of the senders (see below), or  
298 insufficient externalization of XIP by the sender under these particular conditions. Additionally,  
299 differences in XIP turnover due to the localized accumulation of a protease(s) that cleaves XIP  
300 before it can diffuse could also explain the differences between experiments.

301 One interesting finding from this experiment is that self-activation from the sender strain  
302 (intracellular signaling) was more apparent and of a greater magnitude than observed for the  
303 responder strain (intercellular signaling). As seen in Figure 4A and 4C, the senders are self-  
304 activating and the responders remain largely inactive, in terms of *comX* promoter activity, to the  
305 signal in comparison to when sXIP was added (Figs. 4B and 4D). Such behavior may indicate,  
306 at least within the confines of this experimental design, that the ComRS pathway is more  
307 efficient for intracellular signaling than for intercellular communication. The *S. mutans*  
308 competence pathway is unique among streptococci in that a ComCDE-like system, the  
309 activation of which is dependent on the quorum sensing molecule CSP, is linked to ComRS and  
310 that addition of sCSP to a peptide-rich medium results in a  $\sim 10^3$  increase in transformation  
311 efficiency. One must therefore consider, based on these findings, whether the ComRS pathway  
312 in *S. mutans* functions primarily as an intracellular signal driven by its positive feedback loop.  
313 Such a model for the importance of internal auto-activation by ComRS in complex medium,  
314 such as BHI, has been previously presented (9). Importantly, an ability for XIP to function in self-  
315 activation of cells and also as an intercellular signaling molecule are not mutually exclusive.  
316 There is a high degree of specificity of the *S. mutans* ComR protein for XIP from *S. mutans*, but  
317 XIP variants from other streptococcal species do not appear to interact with ComR of *S. mutans*;

318 whereas certain other ComR proteins are able to interact with XIP from non-cognate species  
319 (21). Also of interest is the fact the ComS is extremely highly conserved between isolates of *S.*  
320 *mutans* (30). Perhaps the stringency of the *S. mutans* ComR-XIP interaction and high degree of  
321 conservation of XIP sequence in this organism reflects evolutionary pressures and niche  
322 adaptations that favored activation of competence only with a signal input from other strains of  
323 *S. mutans* in complex populations in humans.

324

325 *ComRS signaling in biofilm populations analyzed by microscopy and flow cytometry.*

326 As noted above, the natural environment for *S. mutans* is in biofilms, enmeshed in  
327 exopolymeric material of bacterial and host origin, so we next evaluated ComRS signaling from  
328 sender to responder in an *in vitro* biofilm model system where the exopolysaccharides were  
329 generated during the experiment by enzymatic activities of *S. mutans*. To achieve an  
330 approximately equal number of sender and responder cells in the model biofilm system for the  
331 duration of the experiments, an optimal ratio of sender:responder inoculum was first determined.  
332 Beginning with a 1:1 ratio of sender:responder grown in FMC medium and incubating the  
333 biofilms for 18 hours, it was determined after biofilm dispersal and plating that the *comS*-  
334 overexpressing strain was underrepresented with respect to the *PcomX::gfp* responder strain,  
335 with the responder constituting  $91 \pm 3\%$  of the viable colonies recovered (Supplemental Figure  
336 2). We attributed this observation to the somewhat slower growth of the *comS* overexpressing  
337 strain (Supplemental Figure 3), and possibly to an enhancement in lytic behaviors associated  
338 with *comS* overexpression. However, since ComRS signaling is impaired in acidic conditions  
339 (28, 29), we reasoned that different inocula ratios of sender:responder coupled with  
340 replacement of the supernates with fresh medium after 6 h might enhance the representation of  
341 the *comS*-overexpressing (sender) strain in the biofilm. Allowing for sufficient sender  
342 representation was considered essential for the study of signaling. We tested three different  
343 ratios of sender:responder biofilm inocula: 4:1, 1:1, and 1: 4. The 4:1 sender:responder



344 inoculum resulted in roughly equivalent representation of the two strains after 18 h of incubation;  
345  $48 \pm 10\%$  of the viable colonies recovered were senders. The 4:1 ratio of sender:responder also  
346 yielded the greatest amount of biomass, as measured by crystal violet staining at the end of the  
347 18 h incubation period. Hence, all biofilm experiments were conducted with the 4:1 biofilm  
348 inoculum of sender:responder, unless otherwise noted.

349 ComRS signaling within co-culture biofilm populations of *S. mutans* was visualized after  
350 18 h of incubation in FMC medium, with replacement of spent medium with fresh medium at 6 h.  
351 As a positive control, sXIP was added with the fresh medium at the 6-h time point in a final  
352 concentration of 50 nM. Fluorescence images from both the sXIP-treated control and co-culture  
353 biofilms that received no sXIP treatment were obtained for both the RFP-marked sender strain  
354 and the GFP responder strain using confocal microscopy (Figure 5A). To quantify the proportion  
355 of GFP-positive responders, biofilm populations grown under the same conditions were  
356 harvested, sonicated to isolate individual cells, and analyzed via flow cytometry. A robust  
357 response to sXIP was seen in the control biofilm population, with  $65 \pm 3\%$  of single cells  
358 expressing GFP (Figure 5B). In comparison, the co-culture biofilm population had measurable  
359 GFP expression, but in a diminished proportion of the cells ( $12 \pm 2\%$ ). In addition, the sender  
360 strain constituted a greater proportion of the co-culture population ( $45 \pm 4\%$ ) than in biofilms  
361 treated with sXIP ( $18 \pm 3\%$ ), likely due to enhanced sensitivity of the ComS-overproducing strain  
362 to growth inhibition and/or induction of lysis by sXIP.

363 As the *comS*-overexpressing (sender) strain has apparently decreased fitness in biofilm  
364 populations compared to a similar strain with an otherwise wild-type genetic background  
365 (responder), we next grew biofilms with an original inoculum of either sender or responder, and  
366 added the other strain at 6 h, along with fresh medium, to establish the co-cultures. Under  
367 growth conditions in which the *comS*-overexpressing strain was allowed to establish first in the  
368 biofilm, an increased proportion ( $61 \pm 3\%$ ) of cells displayed *dsRed* fluorescence by flow  
369 cytometry, compared to when the strains were added together in the initial inoculum ( $45 \pm 4\%$ ).



370 However, the proportion of the GFP-positive PcomX::*gfp* strain remained unchanged when  
371 contrasting co-inoculation with inoculation with the responder strain at 6 h ( $11 \pm 4\%$  to  $12 \pm 2\%$ ,  
372 respectively). However, when the responder strain was established first, very little GFP or RFP  
373 fluorescence activity was observed, either by confocal microscopy or flow cytometry. This is  
374 most likely due to the *comS*-overexpressing strain not being able to establish and/or persist  
375 after the strain with the wild-type genetic background had already established a biofilm. Overall,  
376 ComRS signaling in co-culture biofilms was strongly dependent on the timing of introduction of  
377 the second strain and the proportions of the sender; a finding that is not surprising in light of the  
378 established impacts of low pH, growth phase and other factors on the efficiency of XIP-  
379 dependent activation of *comX*.

380

381 *Sucrose reduces intercellular XIP signaling in biofilms.*

382 *S. mutans* strains are genomically and phenotypically diverse members of the oral  
383 microbiome that predominantly colonize hard surfaces. A substantial body of evidence  
384 implicates these organisms as primary etiological agents of human dental caries (31). Among  
385 the many attributes that enable *S. mutans* to be an effective caries pathogen are its potent  
386 acidogenic and aciduric properties, coupled with its capacity to utilize sucrose to form copious  
387 quantities of extracellular polysaccharide (EPS) via three glucosyl- and one fructosyl-transferase  
388 enzymes (Gtfs and Ftfs) (32). Gtfs, through *in situ* synthesis on the acquired enamel pellicle,  
389 provide initial colonization sites for *S. mutans*, and produce the insoluble EPS matrix that  
390 encases the bacteria, leading to the establishment of complex 3-dimensional biofilm structures  
391 (33). Within these structures are highly diverse microenvironments that may influence diffusion  
392 of chemical compounds and peptides that function in interbacterial communication. All  
393 experiments herein were, to this point, conducted using FMC containing 20 mM glucose as the  
394 sole carbohydrate source. To explore how addition of sucrose and production of an EPS matrix  
395 would impact XIP signaling, we grew co-culture biofilms with low (2.5 mM to 15 mM), medium (5

396 mM to 10 mM) and high (9 mM to 2 mM) ratios of sucrose to glucose; sucrose is a disaccharide,  
397 so the weight-to-volume concentrations of fermentable carbohydrates were constant across all  
398 experiments. In all conditions in which sucrose was present, XIP activation within the co-culture  
399 biofilm was evident (Figure 6). Interestingly, though, when sucrose was provided, a spatial  
400 organization pattern between the *comS*-overexpressing sender and *PcomX::gfp/UA159*  
401 responder became apparent, with the two strains segregating into different regions of the  
402 biofilms (Figure 6A). In terms of both proportion of cells responding and overall *gfp* intensity  
403 from the *PcomX::gfp* strain, measurable *gfp* fluorescence was reduced under conditions in  
404 which sucrose was added to the growth medium (Figures 6B). In 20 mM glucose alone, the  
405 proportion of *gfp* expressers was  $19 \pm 2\%$  and median GFP intensity was  $4.3 \pm 0.5$  au (arbitrary  
406 fluorescent units), whereas  $5 \pm 1\%$  of the population expressed *gfp* and intensity was recorded  
407 as  $3.1 \pm 0.1$  au under all sucrose conditions tested. Similar to the co-culture experiments within  
408 the FMC/agarose gel, an increase in the strength of intracellular signaling was observed as RFP  
409 intensity measured in the sender strain increased from  $17.9 \pm 0.9$  au in biofilms formed in 20  
410 mM glucose to  $25.3 \pm 0.9$  au when the highest sucrose concentration was present. Similar  
411 decreases in measurable *gfp* fluorescence due to the presence of sucrose were observed  
412 when the co-culture experiment was conducted in planktonic growth conditions rather than  
413 biofilms (Figure 6C). The abolishment of XIP signaling in medium- and high-sucrose conditions  
414 was not due to changes in the *comS*-producing sender cells, as *PcomS* feedback showed  
415 similar activation in all conditions (Figure 6D). Together the biofilm and planktonic experiments  
416 show that addition of sucrose to the growth medium significantly impact the ability of the sender  
417 strain to activate the responder.

418 To further evaluate the basis for the negative impact of sucrose and the resultant  
419 polysaccharide matrix on intercellular signaling by XIP within biofilm populations, biofilms of  
420 *PcomX::gfp/UA159* were grown with low, medium, and high ratios of sucrose to glucose for 5 h  
421 before sXIP was added. GFP production was monitored at selected time intervals, both by

422 relative fluorescence in a plate reader and by confocal microscopy (Supplemental Figure 4).  
423 Ample *comX* activation was noted in biofilms cultured in low-sucrose conditions when a final  
424 concentration of 200 nM or 2  $\mu$ M sXIP was provided. However, at the intermediate sucrose  
425 concentration, activation was only seen with 2  $\mu$ M sXIP and yielded a relative fluorescence that  
426 was 3.5-fold lower compared to the low-sucrose condition. The most substantial effects were  
427 seen in the high-sucrose condition, where 2  $\mu$ M sXIP was unable to activate the *PcomX*  
428 responder strain. In fact, 10  $\mu$ M sXIP was needed to measure GFP production within the high-  
429 sucrose biofilms. Collectively, these data highlight that provision of sucrose, which dramatically  
430 alters the biofilm EPS matrix and influences the physiology and transformability of *S. mutans*  
431 (34, 35), has an overall negative impact on the response of cells to XIP.

432 One potential explanation for the reduced response by the responder strain when  
433 various amounts of sucrose were present in the growth medium is slower diffusion of the  
434 secreted XIP peptide within the biofilms due to increased EPS formation. The reduced diffusion  
435 of XIP could lead to changes in the spatial distribution and temporal dynamics of ComRS  
436 signaling within biofilm populations, leading to increased phenotypic heterogeneity within the  
437 biofilm. Such observations were recently noted in the study of quorum sensing systems within  
438 biofilms under flowing conditions (36). The images in Figure 6A show that some spatial  
439 correlation between sender and responder is evident, such that clusters of senders and  
440 responders appear segregated, even though the biofilm inoculum consists of uniform  
441 suspension of senders and responders. A comparison of merged and brightfield images also  
442 shows that certain cells within the biofilm population remain unresponsive to the sender's signal  
443 (Supplemental Figure 5). Similar phenotypic heterogeneity was recently noted in monoculture  
444 biofilms that had been treated with sXIP peptide, and notably, there was little evidence of cell  
445 death in biofilms cultured under similar conditions (24). Thus, it will be interesting to unravel why  
446 these cells within the biofilm are unresponsive, although it can be hypothesized that some are  
447 unresponsive due to slow growth or to being confined to microenvironments that inhibit uptake

448 or responses to signal(s) inputs. Further study of the spatial organization of various modified  
449 sender and responder strains should yield a more complete understanding the role of biofilm  
450 architecture on signaling, and vice versa.

451

452 *Lysis of the sender strain contributes significantly to XIP signaling.*

453 A critical gap in our current understanding of the ComS/XIP system of *S. mutans* is that  
454 the export apparatus and protease that generate released XIP from ComS have not been  
455 identified. Several attempts have been made to identify both the presumptive exporter and the  
456 protease in *S. mutans* (13, 20, 37). The ABC transporter PptAB was identified recently in *S.*  
457 *pyogenes* as an SHP exporter, but XIP secretion in *S. mutans* was only partially reduced in a  
458 *pptAB* deletion (38). These results indicate that other mechanisms exist by which XIP appears  
459 in the supernatant fraction of *S. mutans* cultures (13, 15). Since the studies detailed above  
460 provide ample evidence for intercellular activation of ComRS under conditions in which  
461 substantial amounts of cell lysis occur, such as overnight planktonic growth (Figure 2) and  
462 growth within biofilms (Figures 5 and 6), but a lack of intercellular activation when early  
463 exponential phase cells were spatially separated and fixed within an agarose suspension  
464 (Figure 4), we examined whether active cell lysis was important for the release of the ComS/XIP  
465 signal to potential responders. To accomplish this, we monitored XIP signaling activity in  
466 supernates of *comS*-overexpressing cells in a wild-type genetic background and in a strain  
467 lacking the major autolysin, AtlA ( $\Delta atlA$ ) (Figure 7) (39). Whereas supernates from UA159 or the  
468  $\Delta atlA$  mutant failed to activate the *PcomX::gfp*/UA159 reporter, the supernates from the *comS*-  
469 overexpressing strain in an AtlA-positive strain activated *PcomX* expression in the responder,  
470 similar to the results reported above (Figure 2A). However, no detectable GFP fluorescence  
471 was observed when the supernates from the *comS*-overexpressing strain carrying the *atlA*  
472 deletion was supplied to the responder strain (Figure 7A). These data are corroborated by  
473 growth curves of the *PcomX::gfp*/UA159 responder strain in the selected supernates, as growth

474 in the supernates from the 184*comS*/UA159 strain was slower than in supernates from UA159,  
475  $\Delta$ *atlA* and 184*comS*/ $\Delta$ *atlA*, attributable to diminished XIP-dependent growth inhibition and/or  
476 XIP-induced lysis of the responder. Experiments using a *PcomX::gfp*/ $\Delta$ *comS* responder strain,  
477 which eliminates the auto-feedback loop and self-activation through activation of *comS* by  
478 ComR-XIP, also showed no activation in response to the *atlA* mutant supernates (Figures 7B).  
479 These data provide intriguing new evidence that externalization of ComS/XIP in *S. mutans* may  
480 depend, entirely or in part, on cell lysis or loss of membrane integrity, rather than on a dedicated  
481 secretion apparatus, as is the case for a number of other streptococci (16, 38).

482 A number of properties of the ComRS system of *S. mutans* in particular may provide an  
483 explanation for why cell lysis could be the primary pathway for XIP externalization. First,  
484 ComRS is extremely highly conserved among *S. mutans* isolates, with almost no variation in  
485 ComS sequence and none in the sequence of XIP (30). Similarly, ComR of *S. mutans* very  
486 specifically recognizes *S. mutans* XIP, but not XIP from other sources. Similar to the ComS  
487 sequences of the *Streptococcus bovis* group (40), *S. mutans* ComS sequence is short (17-aa)  
488 and lacks a typical signal sequence used for active export. It is also notable that *S. mutans* has  
489 an obligatory biofilm lifestyle, where regulated cell death and lysis, along with eDNA release  
490 (41), are critically important for biofilm maturation and stability (42). *S. mutans* may thus have  
491 evolved in a way that a dedicated ComS/XIP exporter was dispensable, as autolysis of bacterial  
492 cells during biofilm growth could be sufficient to release XIP at levels that are effective for its  
493 function(s) (41). The release by lysis also would serve as an altruistic signal to viable *S. mutans*  
494 that *S. mutans* DNA has been released into the environment, which may have aided in the  
495 diversification of the species by tuning competence to the preferential assimilation of DNA that  
496 could be sufficiently homologous to recombine with the competent population. If confirmed,  
497 these findings may also explain why *S. mutans* bacteriocin production and autolysis are more  
498 intimately intertwined with competence development than in some other streptococcal species  
499 (43, 44). CSP-induced activation of bacteriocins, some of which can kill sensitive strains of *S.*

500 *mutans*, could trigger lysis in the sensitive sub-population, which would then release XIP and  
501 DNA for the now-competent members of the biofilm. The hypothesis also takes into  
502 consideration Wenderska *et. al.*'s observation that deletion of *comX* reduces the abundance of  
503 XIP in culture supernates (37), as this deletion would remove competence-driven lysis as a  
504 release pathway. It is also interesting to posit that maturation of ComS to XIP may actually be a  
505 consequence of induced cell lysis and activation of proteolytic pathways, such that when a cell  
506 lyses, XIP would be released. Currently unknown protease(s), which may be activated during  
507 programmed cell lysis, could then generate the 7-aa XIP peptide from the 17-aa ComS during  
508 cell death to activate nearby responder cells, allowing for the uptake of homologous pieces of  
509 DNA leading to enhanced biofilm formation and an increased fitness of the present population.  
510

511 **SUMMARY**

512           Recent analysis of bacterial communication at the single cell level and *in situ* in biofilm  
513 systems has led to revision of numerous views of intercellular signaling in “natural” populations.  
514 While many of these advances have been made with well-established model organisms (e.g.  
515 *Bacillus subtilis*, *Staphylococcus aureus*, *Escherichia coli*, *Pseudomonas aeruginosa*), the oral  
516 pathogen *S. mutans* regulates multiple biological processes, including genetic competence,  
517 bacteriocin production, biofilm maturation and tolerance of environmental insults, through a suite  
518 of small hydrophobic peptides (26, 27) and dedicated transcriptional regulators (45, 46). Many  
519 of these are unique to this organism, function differently than in paradigm organisms, and are  
520 critical to the ability of *S. mutans* to cause disease.

521           Overall, the work presented here highlights a new model system for studying Gram-  
522 positive bacterial communication based on naturally-derived signal oligopeptides from an  
523 overexpressing population, as opposed to the addition of synthetic peptide(s). The model shows  
524 that XIP can, in fact, act as an intercellular signal that does not require cell-cell contact. The  
525 model also allows investigation of responses to XIP in a biological setting that more closely  
526 mimics the natural growth environment of the organism. This work also emphasizes the  
527 differences in signaling behaviors that occur between planktonically grown cultures and those  
528 that are grown within biofilms, where spatial and temporal distribution patterns can have a more  
529 significant impact on interpretation of signal inputs. Development of this system facilitates the  
530 modelling of ComRS behaviors within an environment such as dental plaque, where competition  
531 of *S. mutans* with commensal streptococci strongly influences the pathogenic potential of the  
532 biofilms (47). Importantly, this work also highlights for the first time the connection between lysis  
533 and XIP release, offering an alternative hypothesis for why XIP has been detected mainly in  
534 culture supernates. Future investigations can provide insight into how signaling impacts genetic  
535 and physiological control of early biofilm growth, responses to environmental stresses and  
536 competition between competing oral species, ultimately yielding information that can be used to

537 disrupt key components of the signaling circuit to decrease the proportions of pathogens in

538 dental biofilms.

539



## 540 **EXPERIMENTAL PROCEDURES**

541 *Bacterial strains and growth conditions.* *S. mutans* wild-type strain UA159 and its derivatives  
542 (Table 1) were grown in either brain heart infusion (BHI) (Difco) or FMC medium (48) that was  
543 supplemented with 10  $\mu\text{g ml}^{-1}$  erythromycin and 1  $\text{mg ml}^{-1}$  of kanamycin or spectinomycin, as  
544 needed. Unless otherwise noted, cultures were grown overnight in BHI medium with the  
545 indicated antibiotics, if needed, at 37°C in a 5% CO<sub>2</sub>, aerobic atmosphere. The next day,  
546 cultures were harvested by centrifugation, washed twice in 1 mL of phosphate-buffered saline  
547 (PBS), and resuspended in PBS to remove all traces of BHI. PBS cell suspensions were then  
548 transferred to 5 mL polystyrene round-bottom tubes (Corning Incorporated). The samples were  
549 then sonicated using a Fisher Scientific Model 120 Sonic Dismembrator in the water bath mode  
550 at 100% amplitude for three intervals of 30 s each, with placement on ice for the intervals.  
551 Sonicated cell suspensions were subjected to a final centrifugation to remove any cellular debris  
552 and resuspended in the desired medium before diluting to begin each experiment. Synthetic XIP  
553 (sXIP, aa sequence = GLDWWSL), corresponding to residues 11-17 of ComS, was synthesized  
554 and purified to 96% homogeneity by NeoBioSci (Cambridge, MA). The lyophilized sXIP was  
555 reconstituted with 99.7% dimethyl sulfoxide (DMSO) to a final concentration of 2 mM and stored  
556 in 100  $\mu\text{L}$  aliquots at -20°C

557

558 *Construction of bacterial strains.* Mutant strains of *S. mutans* were created using a PCR ligation  
559 mutagenesis approach, as previously described (49). Overexpression of genes was achieved  
560 by amplifying the structural genes of interest from *S. mutans* UA159 and cloning into the  
561 expression plasmid pIB184 (25). Transformants were confirmed by PCR and sequencing after  
562 selection on BHI agar with appropriate antibiotics. Plasmid DNA was isolated from *E. coli* using  
563 QIAGEN (Chatsworth, Calif.) columns, and restriction and DNA-modifying enzymes were  
564 obtained from Invitrogen (Gaithersburg, Md.) or New England Biolabs (Beverly, Mass.). PCRs

565 were carried out with 100 ng of chromosomal DNA by using *Taq* DNA polymerase, and PCR  
566 products were purified with the QIAquick kit (QIAGEN).

567

568 *Measurements of GFP fluorescence with plate reader.* For measurements of GFP fluorescence,  
569 co-cultures were inoculated from washed and sonicated overnight cultures in FMC medium at a  
570 1:1 ratio, unless noted otherwise. Inoculated medium (175  $\mu$ L) was added to each well along  
571 with a 50  $\mu$ L mineral oil overlay in a Costar™ 96 well assay plate (black plate with clear bottom;  
572 Corning Incorporated) and incubated at 37°C. At intervals of 30 minutes for a total of 18 hours,  
573 absorbance at 600 nm along with GFP fluorescence (excitation 485/20 nm, emission 528/20  
574 nm) was measured with a Synergy 2 multimode microplate reader (BioTek). Relative  
575 expression was calculated by subtracting the background fluorescence of UA159 (mean from  
576 six replicates) from raw fluorescence units of the reporter strains and then dividing by OD<sub>600</sub>.

577

578 *Measurement of diffusive XIP spreading.* To estimate a diffusion constant for sXIP and the  
579 ComRS system, *PcomX::gfp/ΔcomS* cells were injected into an IBIDI microslide (ibidi GmbH,  $\mu$ -  
580 slide VI), a slide having 6 parallel, narrow channels, each with a loading port at both ends. The  
581 cells were allowed to settle to the surface of the channels before a 2% low-melting-point  
582 agarose/FMC gel was pushed through each channel to immobilize individual cells on the  
583 channel window. Injection of the agarose/FMC mixture removed any cells that were not stuck to  
584 the slide. sXIP that was reconstituted in DMSO and diluted into FMC to a final 1  $\mu$ M  
585 concentration that was then deposited in one port of each channel, with an equal volume of DI  
586 water in the opposite port to balance the hydrostatic pressure in the channel. The resulting  
587 culture was then incubated at 37°C with mineral oil sealing the loading ports to minimize drying  
588 of the cooled agarose. Green fluorescence of individual *PcomX::gfp/ΔcomS* reporter cells was  
589 measured as a function of position and time, relative to the XIP loading, in order to estimate the  
590 diffusion constant for sXIP in the medium. Cells were imaged at 20X (CFI Plan Fluor DLL, NA

591 0.5, Nikon) onto a cooled CCD camera (CoolSNAP HQ2, Photometrics). Images were collected  
592 in phase contrast, GFP fluorescence (using a Nikon C-FL GFP HC HISN zero shift filter cube),  
593 or red fluorescence (C-FL Y-2E/C Texas Red filter cube, Nikon). Three images of each channel  
594 were collected at intervals of one hour, for periods up to five hours, after introduction of sXIP.  
595 The expression of GFP in individual cells was quantified by a previously described method (9,  
596 50). Fitting of the diffusion coefficient was performed in Matlab® (The Mathworks, Inc.) and was  
597 done by minimizing the difference between measured GFP response and one calculated from a  
598 1D diffusion equation model with a delta function of XIP concentration at the origin as an initial  
599 condition. The error on this fit was checked by a 1000-iteration bootstrap method, with the  
600 standard deviation of calculated diffusion coefficient values used as the fit error.

601  
602 *Co-culture within agarose/FMC mixture.* *PcomX::dsRed/pIB184comS* (sender strain) and  
603 *PcomX::gfp* reporter in either a UA159 or  $\Delta comS$  background (responder strain) were mixed  
604 together at OD<sub>600</sub> of 0.1 in liquid FMC at a 2.3::1 ratio before injection into an IBIDI microslide  
605 and immobilized with a 2% low-melting temperature agarose/FMC mixture. The resulting culture  
606 was grown in an incubated chamber with mineral oil on top of the injection holes to minimize  
607 drying. Imaging was performed at intervals to examine reporter fluorescence, as previously  
608 described (9, 29). sXIP (1  $\mu$ M) was added as a positive control, and channels containing solely  
609 GFP reporter cells were also imaged as a negative control.

610  
611 *Fitness assessment.* Fitness between the *comS*-overexpressing strain and the *PcomX::gfp*  
612 responder strain carrying a kanamycin resistance marker (pPMZ) was determined from 18 h  
613 biofilms inoculated with either a 4::1, 1::1, or 1::4 ratio of sender::responder and grown in 6 well  
614 polystyrene flat bottom plates (Corning Incorporated). At the end of the 18 h incubation, biofilms  
615 were washed twice in PBS to remove unattached cells, scraped from the 6 well plates using a  
616 cell scraper, and sonicated in a water bath sonicator for 3 intervals of 30 seconds in 5 mL

617 polystyrene round-bottom tubes. Single cells resuspended in PBS were then serially diluted and  
618 plated on either BHI, erythromycin-BHI, or kanamycin-BHI plates for selective plating. After 48  
619 hours of incubation at 37°C in 5% CO<sub>2</sub>, plates were removed, imaged, and viable colonies  
620 enumerated from each plate. Fitness of each strain was then determined by taking the sum of  
621 viable colonies from the erythromycin-BHI and kanamycin-BHI plates, dividing by the  
622 erythromycin-BHI count and multiplying by 100 to determine a viable count percentage returned  
623 of each strain from the grown biofilm.

624

625 *Confocal laser scanning microscopy.* Sonicated overnight cultures were washed and re-  
626 suspended in FMC before being diluted 1:50 overall into fresh medium with the desired  
627 sender:responder co-culture ratio. Diluted cell suspensions (350 µL) were inoculated into each  
628 well of an 8-well µ-Slide (ibidi USA) chambered coverslip as well as a 6-well polystyrene flat  
629 bottom plate (2.5 mL) to be used for flow cytometry analysis. Plates were incubated at 37°C in a  
630 5% CO<sub>2</sub>, aerobic atmosphere for a total of 18 h. At the 6-h time point, spent medium was  
631 removed from the biofilms and fresh medium applied along with either sXIP or another strain, if  
632 desired. Prior to analysis by microscopy, wells were washed 3 times with PBS and were kept  
633 hydrated with 100 µL of PBS. Biofilm images were acquired using a spinning disk confocal  
634 system connected to a Leica DMIRB inverted fluorescence microscope equipped with a  
635 Photometrics cascade-cooled EMCCD camera. GFP fluorescence was detected by excitation at  
636 488 nm and emission was collected using a 525 nm (±25 nm) bandpass filter. Detection of  
637 dsRed fluorescence (RFP) was performed using a 642-nm excitation laser and a 695-nm (±53-  
638 nm) bandpass filter. All z-sections were collected at 1 µm intervals using an 63X/1.40 oil  
639 objective lens. Image acquisition and processing was performed using VoxCell (VisiTech  
640 International).

641

642 *Flow cytometry.* Biofilms grown in 6-well flat bottom plates were scraped from the surface of  
643 wells before being run through a FACSCalibur™ (BD Biosciences) flow cytometer. At the end of  
644 the 18-h incubation, biofilms were washed twice in PBS to remove unattached cells, scraped  
645 from the 6-well plates using a cell scraper, and sonicated in a water bath sonicator for 3  
646 intervals of 30 seconds in 5 mL polystyrene round-bottom tubes to achieve primarily single cells  
647 for analysis. Forward and side scatter signals were set stringently to allow sorting of single cells.  
648 In total,  $5 \times 10^4$  cells were counted from each event, at a maximum rate of  $2 \times 10^3$  cells per  
649 second, and each experiment was performed in triplicate. Detection of GFP fluorescence was  
650 through a 530 nm ( $\pm 30$  nm) bandpass filter, and dsRed was detected using a 670-nm long pass  
651 filter. Data were acquired for unstained cells and single-color positive controls so that data  
652 collection parameters could be properly set. The data were collected using Cell Quest Pro (BD  
653 Biosciences) and analyzed with FCS Express 4 (De Novo Software). Gating for quadrant  
654 analysis was selected by using a dot density plot with forward and side scatter, with gates set to  
655 capture the densest section of the plot. Graphing and statistical analyses were performed using  
656 Prism (GraphPad Software). x- and y-axis data represent logarithmic scales of fluorescent  
657 intensity (arbitrary units).

658

659 *Monitoring XIP-signaling using filtered supernates.* Filtered culture supernates from selected  
660 strains of *S. mutans* were produced by centrifugation of cultures diluted 20-fold from overnight  
661 and grown to OD = 0.85-1.0. The resulting supernatant fluid was adjusted to pH 7.0 using 6.25  
662 N NaOH and concentrated glucose was added to increase the amount of glucose in the  
663 supernates by 20 mM. The resulting solution was then filtered using a 0.22  $\mu$ m PVDF syringe  
664 filter. *PcomX::gfp* reporter cells with either UA159 or  $\Delta comS$  background were diluted 20-fold  
665 from an overnight culture, grown to OD<sub>600</sub> of 0.1 and collected via centrifugation. The supernates  
666 of the reporter cells were removed and replaced with the same volume of the pH- and glucose-  
667 corrected supernates of the strains of interest. For sXIP controls, supernates were replaced with

668 fresh FMC, after which sXIP was added in the indicated concentrations. Two mL of the resulting  
669 reporter cell-supernate combinations were then placed in a Falcon 24 well plate (Corning Inc.),  
670 covered with mineral oil and the OD<sub>600</sub> and green fluorescence (excitation 485nm, emission  
671 528nm filter set) were measured in a BioTek Synergy 2<sup>®</sup> plate reader, shaking gently before  
672 each reading to prevent cell settling.

673

674

675

676 **ACKNOWLEDGEMENTS**

677 Research reported in this publication was supported by the National Institute of Dental and

678 Craniofacial Research of the National Institutes of Health under Award Numbers R01

679 DE023339, R01 DE13239, T90 DE21990 and F31 DE024416.

680

681 REFERENCES

- 682 1. **Fuqua WC, Winans SC, Greenberg EP.** 1994. Quorum sensing in bacteria: the LuxR-  
683 LuxI family of cell density-responsive transcriptional regulators. *J Bacteriol* **176**:269–75.  
684
- 685 2. **Kostakioti M, Hadjifrangiskou M, Hultgren SJ.** 2013. Bacterial biofilms: development,  
686 dispersal, and therapeutic strategies in the dawn of the postantibiotic era. *Cold Spring*  
687 *Harb Perspect Med* **3**:a010306.  
688
- 689 3. **Boyer M, Wisniewski-Dyé F.** 2009. Cell-cell signalling in bacteria: not simply a matter of  
690 quorum. *FEMS Microbiol Ecol* **70**:1–19.  
691
- 692 4. **Lyon GJ, Novick RP.** 2004. Peptide signaling in *Staphylococcus aureus* and other  
693 Gram-positive bacteria. *Peptides* **25**:1389–1403.  
694
- 695 5. **Monnet V, Juillard V, Gardan R.** 2014. Peptide conversations in Gram-positive bacteria.  
696 *Crit Rev Microbiol* 1–13.  
697
- 698 6. **Johnston C, Martin B, Fichant G, Polard P, Claverys J-P.** 2014. Bacterial  
699 transformation: distribution, shared mechanisms and divergent control. *Nat Rev Microbiol*  
700 **12**:181–96.  
701
- 702 7. **Mashburn-Warren L, Morrison DA, Federle MJ.** 2010. A novel double-tryptophan  
703 peptide pheromone controls competence in *Streptococcus* spp. via an Rgg regulator. *Mol*  
704 *Microbiol* **78**:589–606.  
705
- 706 8. **Håvarstein LS.** 2010. Increasing competence in the genus *Streptococcus*. *Mol Microbiol*  
707 **78**:541–4.  
708
- 709 9. **Son M, Ahn S-J, Guo Q, Burne RA, Hagen SJ.** 2012. Microfluidic study of competence  
710 regulation in *Streptococcus mutans*: environmental inputs modulate bimodal and  
711 unimodal expression of *comX*. *Mol Microbiol* **86**:258–72.  
712
- 713 10. **Lemos JA, Quivey RG, Koo H, Abranches J.** 2013. *Streptococcus mutans*: a new  
714 Gram-positive paradigm? *Microbiology* **159**:436–45.  
715
- 716 11. **Hossain MS, Biswas I.** 2012. An extracellular protease, SepM, generates functional  
717 competence-stimulating peptide in *Streptococcus mutans* UA159. *J Bacteriol* **194**:5886–  
718 96.  
719
- 720 12. **Shanker E, Federle M.** 2017. Quorum sensing regulation of competence and  
721 bacteriocins in *Streptococcus pneumoniae* and *mutans*. *Genes (Basel)* **8**:15.  
722
- 723 13. **Khan R, Rukke H V, Ricomini Filho AP, Fimland G, Arntzen MØ, Thiede B, Petersen**  
724 **FC.** 2012. Extracellular identification of a processed type II ComR/ComS pheromone of  
725 *Streptococcus mutans*. *J Bacteriol* **194**:3781–8.  
726
- 727 14. **Desai K, Mashburn-Warren L, Federle MJ, Morrison DA.** 2012. Development of  
728 competence for genetic transformation of *Streptococcus mutans* in a chemically defined  
729 medium. *J Bacteriol* **194**:3774–80.  
730



- 731 15. **Wenderska IB, Lukenda N, Cordova M, Magarvey N, Cvitkovitch DG, Senadheera**  
732 **DB.** 2012. A novel function for the competence inducing peptide, XIP, as a cell death  
733 effector of *Streptococcus mutans*. FEMS Microbiol Lett **336**:104–12.  
734
- 735 16. **Gardan R, Besset C, Gitton C, Guillot A, Fontaine L, Hols P, Monnet V.** 2013.  
736 Extracellular life cycle of ComS, the competence-stimulating peptide of *Streptococcus*  
737 *thermophilus*. J Bacteriol **195**:1845–55.  
738
- 739 17. **Fontaine L, Goffin P, Dubout H, Delplace B, Baulard A, Lecat-Guillet N, Chambellon**  
740 **E, Gardan R, Hols P.** 2013. Mechanism of competence activation by the ComRS  
741 signalling system in streptococci. Mol Microbiol **87**:1113–32.  
742
- 743 18. **Fontaine L, Boutry C, de Frahan MH, Delplace B, Fremaux C, Horvath P, Boyaval P,**  
744 **Hols P.** 2009. A novel pheromone quorum-sensing system controls the development of  
745 natural competence in *Streptococcus thermophilus* and *Streptococcus salivarius*. J  
746 Bacteriol **192**:1444–1454.  
747
- 748 19. **Cook LC, Federle MJ.** 2014. Peptide pheromone signaling in *Streptococcus* and  
749 *Enterococcus*. FEMS Microbiol Rev **38**:473–92.  
750
- 751 20. **Fleuchot B, Gitton C, Guillot A, Vidic J, Nicolas P, Besset C, Fontaine L, Hols P,**  
752 **Leblond-Bourget N, Monnet V, Gardan R.** 2011. Rgg proteins associated with  
753 internalized small hydrophobic peptides: a new quorum-sensing mechanism in  
754 streptococci. Mol Microbiol **80**:1102–19.  
755
- 756 21. **Shanker E, Morrison DA, Talagas A, Nessler S, Federle MJ, Prehna G.** 2016.  
757 Pheromone recognition and selectivity by ComR proteins among *Streptococcus* species.  
758 PLOS Pathog **12**:e1005979.  
759
- 760 22. **Talagas A, Fontaine L, Ledesma-Garca L, Mignolet J, Li de la Sierra-Gallay I, Lazar**  
761 **N, Aumont-Nicaise M, Federle MJ, Prehna G, Hols P, Nessler S.** 2016. Structural  
762 insights into streptococcal competence regulation by the cell-to-cell communication  
763 system ComRS. PLOS Pathog **12**:e1005980.  
764
- 765 23. **Gardan R, Besset C, Guillot A, Gitton C, Monnet V.** 2009. The oligopeptide transport  
766 system is essential for the development of natural competence in *Streptococcus*  
767 *thermophilus* strain LMD-9. J Bacteriol **191**:4647–55.  
768
- 769 24. **Shields RC, Burne RA.** 2016. Growth of *Streptococcus mutans* in biofilms alters peptide  
770 signaling at the sub-population level. Front Microbiol **7**:1075.  
771
- 772 25. **Biswas I, Jha JK, Fromm N.** 2008. Shuttle expression plasmids for genetic studies in  
773 *Streptococcus mutans*. Microbiology **154**:2275–82.  
774
- 775 26. **Ahn S-J, Kaspar J, Kim JN, Seaton K, Burne R a.** 2014. Discovery of novel peptides  
776 regulating competence development in *Streptococcus mutans*. J Bacteriol **196**:3735–  
777 3745.  
778
- 779 27. **Kaspar J, Ahn S-J, Palmer SR, Choi SC, Stanhope MJ, Burne RA.** 2015. A unique  
780 ORF within the *comX* gene of *Streptococcus mutans* regulates genetic competence and  
781 oxidative stress tolerance. Mol Microbiol **96**:463–482.

- 782 28. **Guo Q, Ahn S-J, Kaspar J, Zhou X, Burne RA.** 2014. Growth phase and pH influence  
783 peptide signaling for competence development in *Streptococcus mutans*. *J Bacteriol*  
784 **196**:227–36.  
785
- 786 29. **Son M, Ghoreishi D, Ahn S-J, Burne RA, Hagen SJ.** 2015. Sharply tuned pH response  
787 of genetic competence regulation in *Streptococcus mutans*: a microfluidic study of the  
788 environmental sensitivity of *comX*. *Appl Environ Microbiol* **81**:5622–31.  
789
- 790 30. **Palmer SR, Miller JH, Abranches J, Zeng L, Lefebure T, Richards VP, Lemos JA,**  
791 **Stanhope MJ, Burne RA.** 2013. Phenotypic heterogeneity of genomically-diverse  
792 isolates of *Streptococcus mutans*. *PLoS One* **8**:e61358.  
793
- 794 31. **Takahashi N, Nyvad B.** 2011. The role of bacteria in the caries process: ecological  
795 perspectives. *J Dent Res* **90**:294–303.  
796
- 797 32. **Bowen WH, Koo H.** 2011. Biology of *Streptococcus mutans*-derived  
798 glucosyltransferases: Role in extracellular matrix formation of cariogenic biofilms. *Caries*  
799 *Res* **45**:69–86.  
800
- 801 33. **Koo H, Falsetta ML, Klein MI.** 2013. The exopolysaccharide matrix: a virulence  
802 determinant of cariogenic biofilm. *J Dent Res* **92**:1065–73.  
803
- 804 34. **Zeng L, Burne RA.** 2015. Sucrose- and fructose-specific effects on the transcriptome of  
805 *Streptococcus mutans* probed by RNA-Seq. *Appl Environ Microbiol* **82**:AEM.02681-15.  
806
- 807 35. **Moye ZD, Son M, Rosa-Alberdy AE, Zeng L, Ahn S-J, Hagen SJ, Burne RA.** 2016.  
808 Effects of carbohydrate source on genetic competence in *Streptococcus mutans*. *Appl*  
809 *Environ Microbiol* AEM.01205-16.  
810
- 811 36. **Kim MK, Ingremeau F, Zhao A, Bassler BL, Stone HA.** 2016. Local and global  
812 consequences of flow on bacterial quorum sensing. *Nat Microbiol* **1**:15005.  
813
- 814 37. **Chang JC, LaSarre B, Jimenez JC, Aggarwal C, Federle MJ.** 2011. Two group A  
815 streptococcal peptide pheromones act through opposing Rgg regulators to control biofilm  
816 development. *PLoS Pathog* **7**:e1002190.  
817
- 818 38. **Chang JC, Federle MJ.** 2016. PptAB exports Rgg quorum-sensing peptides in  
819 *Streptococcus*. *PLoS One* **11**:e0168461.  
820
- 821 39. **Ahn S-J, Burne RA.** 2006. The *atlA* operon of *Streptococcus mutans*: role in autolysin  
822 maturation and cell surface biogenesis. *J Bacteriol* **188**:6877–88.  
823
- 824 40. **Morrison DA, Guédon E, Renault P.** 2013. Competence for natural genetic  
825 transformation in the *Streptococcus bovis* group streptococci *S. infantarius* and *S.*  
826 *macedonicus*. *J Bacteriol* **195**:2612–20.  
827
- 828 41. **Liao S, Klein MI, Heim KP, Fan Y, Bitoun JP, Ahn S-J, Burne RA, Koo H, Brady LJ,**  
829 **Wen ZT.** 2014. *Streptococcus mutans* extracellular DNA is upregulated during growth in  
830 biofilms, actively released via membrane vesicles, and influenced by components of the  
831 protein secretion machinery. *J Bacteriol* **196**:2355–66.  
832

- 833 42. **Bayles KW.** 2007. The biological role of death and lysis in biofilm development. *Nat Rev*  
834 *Microbiol* **5**:721–726.
- 835
- 836 43. **Son M, Shields RC, Ahn S-J, Burne RA, Hagen SJ.** 2015. Bidirectional signaling in the  
837 competence regulatory pathway of *Streptococcus mutans*. *FEMS Microbiol Lett*  
838 **362**:fnv159.
- 839
- 840 44. **Dufour D, Cordova M, Cvitkovitch DG, Lévesque CM.** 2011. Regulation of the  
841 competence pathway as a novel role associated with a streptococcal bacteriocin. *J*  
842 *Bacteriol* **193**:6552–9.
- 843
- 844 45. **Kaspar J, Kim JN, Ahn S-J, Burne RA.** 2016. An essential role for (p)ppGpp in the  
845 integration of stress tolerance, peptide signaling, and competence development in  
846 *Streptococcus mutans*. *Front Microbiol* **7**:1162.
- 847
- 848 46. **Seaton K, Ahn S-J, Sagstetter AM, Burne RA.** 2011. A transcriptional regulator and  
849 ABC transporters link stress tolerance, (p)ppGpp, and genetic competence in  
850 *Streptococcus mutans*. *J Bacteriol* **193**:862–74.
- 851
- 852 47. **Marsh PD.** 2003. Are dental diseases examples of ecological catastrophes? *Microbiology*  
853 **149**:279–294.
- 854
- 855 48. **Terleckyj B, Shockman GD.** 1975. Amino acid requirements of *Streptococcus mutans*  
856 and other oral streptococci. *Infect Immun* **11**:656–664.
- 857
- 858 49. **Lau PC., Sung CK, Lee JH, Morrison DA, Cvitkovitch DG.** 2002. PCR ligation  
859 mutagenesis in transformable streptococci: application and efficiency. *J Microbiol*  
860 *Methods* **49**:193–205.
- 861
- 862 50. **Kwak IH, Son M, Hagen SJ.** 2012. Analysis of gene expression levels in individual  
863 bacterial cells without image segmentation. *Biochem Biophys Res Commun* **421**:425–30.
- 864
- 865 51. **LeBlanc DJ, Lee LN, Abu-Al-Jaibat A.** 1992. Molecular, genetic, and functional analysis  
866 of the basic replicon of pVA380-1, a plasmid of oral streptococcal origin. *Plasmid* **28**:130–  
867 145.
- 868
- 869 52. **Liu Y, Zeng L, Burne RA.** 2009. AguR is required for induction of the *Streptococcus*  
870 *mutans* agmatine deiminase system by low pH and agmatine. *Appl Environ Microbiol*  
871 **75**:2629–37.
- 872

873 **TABLES**

874 TABLE 1. List of strains

| Strain or plasmid               | Relevant Characteristics*                                                      | Source or Reference |
|---------------------------------|--------------------------------------------------------------------------------|---------------------|
| <i>S. mutans</i> Strains        |                                                                                |                     |
| UA159                           | Wild-type                                                                      | ATCC 700610         |
| <i>PcomX::gfp</i> / UA159       | UA159 harboring <i>PcomX::gfp</i>                                              | (9)                 |
| <i>PcomX::gfp/ΔcomS</i>         | $\Delta comS$ harboring <i>PcomX::gfp</i>                                      | (9)                 |
| <i>PcomX::gfp/ΔoppA</i>         | $\Delta oppA$ harboring <i>PcomX::gfp</i>                                      | (9)                 |
| <i>PcomX::gfp</i> /pIB184       | UA159 harboring <i>PcomX::gfp</i> and pIB184                                   | (28)                |
| <i>PcomX::gfp</i> /pPMZ         | UA159 harboring <i>PcomX::gfp</i> and pPMZ                                     | This study          |
| pIB184comS/ UA159               | UA159 harboring pIB184comS                                                     | (28)                |
| <i>PcomS::dsRed</i> /pIB184comS | UA159 harboring <i>PcomS::dsRed</i> and pIB184comS                             | This study          |
| <i>PcomX::dsRed</i> /pIB184comS | UA159 harboring <i>PcomX::dsRed</i> and pIB184comS                             | This study          |
| $\Delta atIA$                   | <i>atIA</i> (SMU.704c) :: NPKm <sup>R</sup>                                    | (39)                |
| pIB184comS / $\Delta atIA$      | $\Delta atIA$ harboring pIB184comS                                             | This study          |
| Plasmids                        |                                                                                |                     |
| pDL278                          | <i>E. coli</i> - <i>Streptococcus</i> shuttle vector, Sp <sup>R</sup>          | (51)                |
| pIB184                          | Shuttle expression plasmid with the constitutive P23 promoter, Em <sup>R</sup> | (25)                |
| pPMZ                            | LacZ fusion integration vector based on pMC195 and pMC340B; Km <sup>R</sup>    | (52)                |

875 \* Em, erythromycin; Km, kanamycin; Sp, spectinomycin.

876

877 **FIGURE LEGENDS**

878 *Figure 1. Model of co-culture system.* (A) To monitor natural ComRS signaling, two strains of *S.*  
879 *mutans* are grown together in a co-culture system. The first strain, the “sender”, contains a  
880 plasmid that allows for the overexpression of the XIP peptide precursor *comS* under the control  
881 of the constitutive  $P_{23}$  promoter. The sender strain also contains pDL278 carrying the gene for  
882 the dsRed fluorescent protein under the control of the *comX* promoter. The second strain, the  
883 “responder”, harbors the *PcomX::gfp* reporter plasmid on pDL278 which becomes activated  
884 when external XIP is imported into the responder via the oligopeptide permease, Opp. The  
885 empty pIB184 vector is also harbored in the responder strain to keep sender and responder  
886 strains as genetically similar as possible. (B) Relative GFP expression and (C) relative RFP  
887 expression with  $OD_{600}$  measurements during co-culture growth of UA159 and  
888 *PcomX::gfp*/UA159 (green; circles), pIB184*comS*/UA159 and *PcomX::gfp*/UA159 (blue;  
889 triangles), pIB184*comS*/UA159 and *PcomX::gfp*/ $\Delta$ *comS* (orange; diamonds), and  
890 pIB184*comS*/UA159 and *PcomX::gfp*/ $\Delta$ *oppA* (red; squares). (D) Relative GFP expression  
891 measurements during co-culture of UA159 (sender) and *PcomX::gfp*/UA159 (responder) using  
892 different concentrations of sXIP (legend) in comparison to growth between pIB184*comS*/UA159  
893 and *PcomX::gfp*/UA159 (black squares; co-culture). Each assay was performed with biological  
894 triplicates.

895  
896 *Figure 2. XIP signaling is cell-cell contact independent.* (A) Relative GFP expression and  $OD_{600}$   
897 measurements of *PcomX::gfp*/UA159 grown either in supernatants of either UA159 (green,  
898 circles), UA159 supplemented with 50 nM sXIP (blue, squares), or pIB184*comS*/UA159  
899 (orange, triangles). Supernatants were taken from overnight cultures of respective strains and  
900 filter sterilized, its pH was adjusted to 7.0, and glucose was added to the spent medium in an  
901 amount equivalent to a concentration of 20 mM. (B) Model of transwell assay using co-cultures  
902 of pIB184*comS*/UA159 and *PcomX::gfp*/UA159. *PcomX::gfp*/UA159 (green) strain is inoculated

903 first in the bottom well, followed by placement of the 0.4  $\mu\text{M}$  polycarbonate membrane insert.  
904 The pIB184comS/UA159 (red) strain is then inoculated in the top well above the membrane. (C)  
905 Relative GFP expression measurements from transwell experiments. Labeling of x-axis denotes  
906 strain inoculated in the upper well first, followed up the strain inoculated in the lower well. Each  
907 assay was performed with biological triplicates. Statistical analysis was performed by Student's  
908 *t*-test. N.S. = not significant.

909

910 *Figure 3. Measurements of XIP spatial diffusion.* *PcomX::gfp/ΔcomS* cells were injected into an  
911 IBIDI microslide and allowed to settle before an agarose/FMC mixture was pushed through the  
912 slide to immobilize the cells. sXIP (1  $\mu\text{M}$ ) was injected into one end of the channel and green  
913 fluorescence of individual cells was monitored at different distances from the site of XIP  
914 injection. (A) 3D plot of average GFP fluorescence of cells in the channel (solid) overlaid with a  
915 fit to a diffusive spreading model (mesh). (B) Phase/fluorescence overlaid images of  
916 *PcomX::gfp/ΔcomS* at distances of 3, 4, 5 and 6 mm from the XIP injection site at 1 h after  
917 injection; (C) 3 h after injection; (D) 5 h after injection.

918

919 *Figure 4. Single-cell observations of ComRS signaling in co-cultures.* Co-cultures of *comS*-  
920 overexpressing sender (*PcomX::dsRed/pIB184comS*) and either *PcomX::gfp/UA159* or  
921 *PcomX::gfp/ΔcomS* responder in a low-melting-point agarose/FMC gel. After loading the gel into  
922 a microfluidic channel, cells were imaged at hourly intervals by phase contrast and fluorescence  
923 microscopy. (A) Fluorescence of *PcomX::dsRed/pIB184comS* and *PcomX::gfp/UA159* co-  
924 culture at 2 h (blue; triangles) and 3 h (red; circle) time points as a single cell scatter plot. (B)  
925 *PcomX::dsRed/pIB184comS* and *PcomX::gfp/UA159* co-culture at 2 h and 3 h with 1  $\mu\text{M}$  sXIP  
926 injected as control. (C) *PcomX::dsRed/pIB184comS* and *PcomX::gfp/ΔcomS* co-culture at 2 h  
927 and 3 h time points. (D) *PcomS::dsRed/pIB184comS* and *PcomX::gfp/ΔcomS* co-culture at 2 h



928 and 3 h time points with 1  $\mu$ M sXIP injected as control. (E-H) Representative images of (A-D) in  
929 the same order.

930

931 *Figure 5. ComRS signaling in biofilms.* Observation of ComRS signaling in 18 h biofilms. (A)  
932 Selected maximum intensity z-section confocal microscopy images of co-culture biofilms. Images  
933 are of a 10  $\mu$ m section of fluorescent range within the biofilm, collected at 1  $\mu$ m intervals using a  
934 63X/1.40 oil objective lens. Y- axis labeling of the panel denotes the order of biofilm inoculation  
935 at time 0 h. (B) Quadrant analysis of collected flow cytometry data from similarly-grown co-  
936 culture biofilms shown in A. Y- axis shows dsRed intensity and X- axis shows GFP intensity.  
937 Quadrants are set to UA159 control. Flow cytometry data was collected from three independent  
938 experiments with triplicate samples.

939

940 *Figure 6. Impact of sucrose on ComRS signaling in biofilms.* Observation of ComRS signaling in  
941 18-h biofilms grown in different concentrations of sucrose. (A) Selected maximum intensity z-  
942 section confocal microscopy images of co-culture biofilms. Images are a 10  $\mu$ m section of  
943 fluorescent range within the biofilm, collected at 1  $\mu$ m intervals using an 63X/1.40 oil objective  
944 lens. X-axis labeling of the panel denotes amount of carbohydrate source used in biofilm growth  
945 medium (No sucrose = 20 mM glucose; low sucrose = 15 mM glucose and 2.5 mM sucrose;  
946 medium sucrose = 10 mM glucose and 5 mM sucrose; high sucrose = 2 mM glucose and 9 mM  
947 sucrose). As sucrose is a disaccharide, carbohydrate concentration (w/v) was the same in each  
948 condition. (B) Quadrant analysis of collected flow cytometry data from similarly-grown co-  
949 culture biofilms as shown in A. Y-axis shows dsRed intensity and X- axis shows GFP intensity.  
950 Quadrants are set to UA159 control. Flow cytometry data was collected from three independent  
951 experiments with triplicate samples. (C) Relative GFP expression and (D) relative RFP  
952 expression with OD<sub>600</sub> measurements during co-culture growth of plB184comS/UA159 and  
953 *PcomX::gfp*/UA159 either no sucrose (green; circles), low sucrose (blue; triangles), medium



954 sucrose (orange; diamonds), or high sucrose (red; squares) added to the growth medium as a  
955 carbohydrate source. Each assay was performed with biological triplicates.

956

957 *Figure 7. Impact of cell lysis on ComRS Signaling.* Fluorescence reporter activity in arbitrary  
958 fluorescent units (au; colored lines) and growth curves (black lines) of responder strains grown  
959 in supernates of sender strains. (A) GFP fluorescence reported as arbitrary fluorescent units of  
960 *PcomX::gfp/UA159* reporter cells grown in overnight supernates (filtrates) of either  
961 *pIB184/UA159* (green; squares), *pIB184/ΔatlA* (blue; circles), *pIB184comS/UA159* (orange;  
962 upward triangles), or *pIB184comS/ΔatlA* (red; downward triangles). Overnight supernates were  
963 pH-corrected to 7.0 using 6.25N NaOH and glucose was replenished to a concentration  
964 equivalent to an additional 20 mM before filtering the supernatant fluids through a 0.22 μM  
965 PVDF syringe. (B) GFP fluorescence of *PcomX::gfp/ΔcomS* reporter cells grown in overnight  
966 supernates (filtrates) as in A. Each assay was performed with biological triplicates.

**A**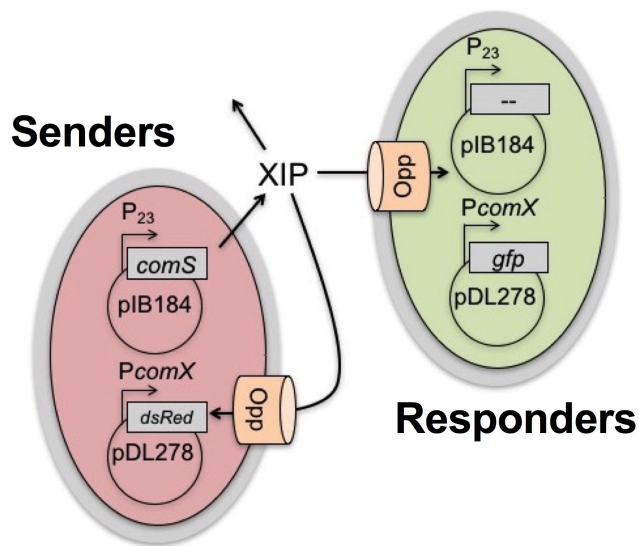**B**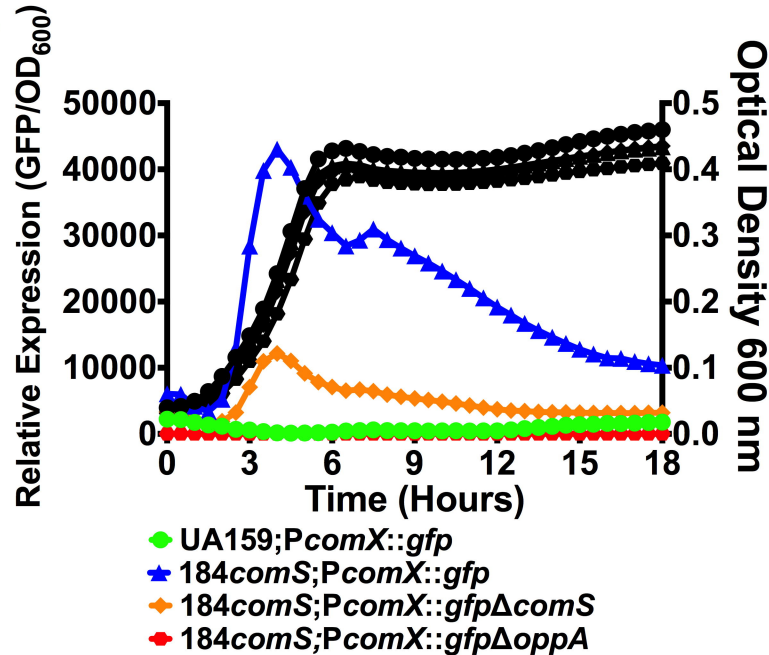**C**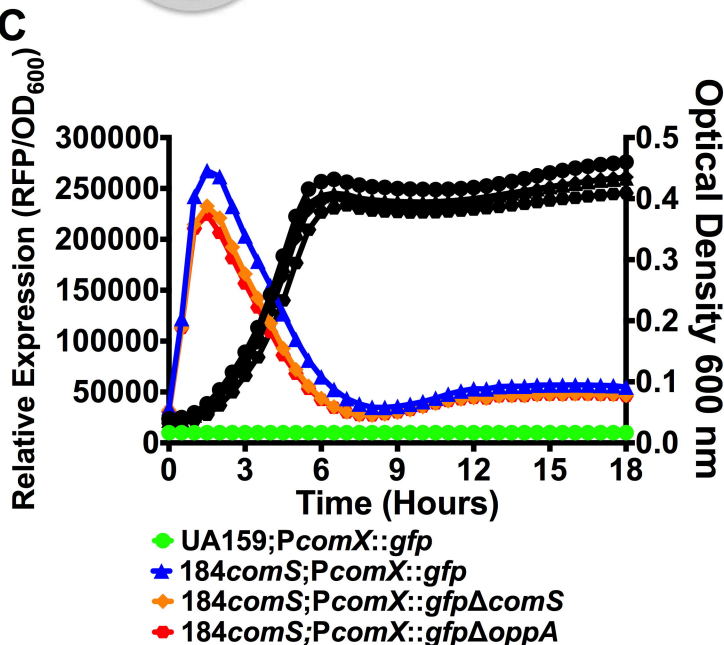**D**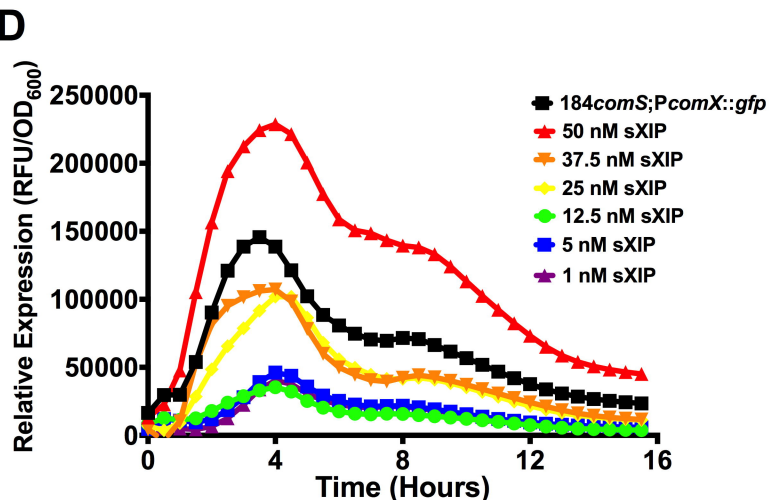

**A**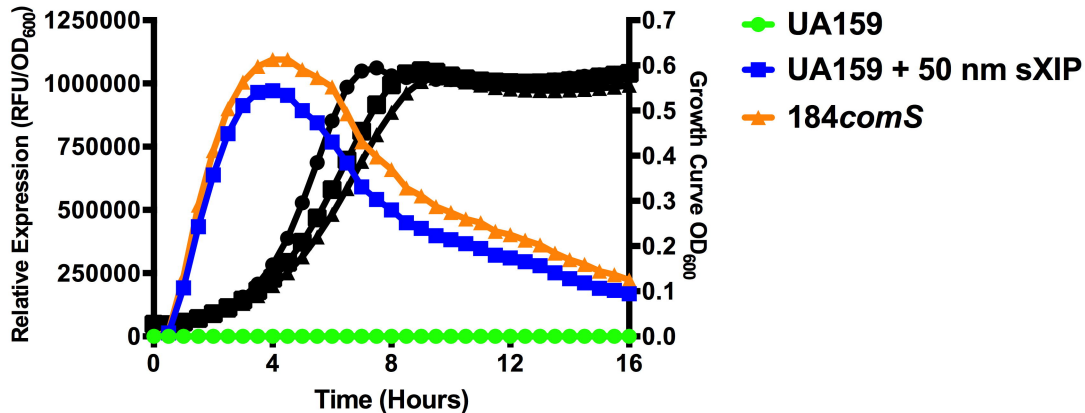**B**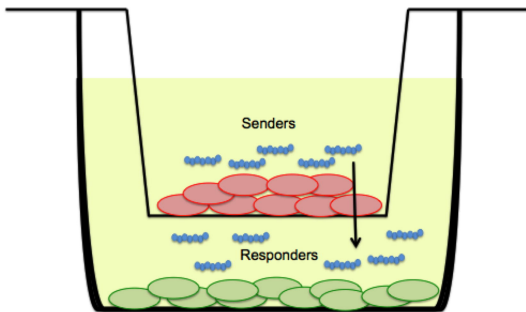**C**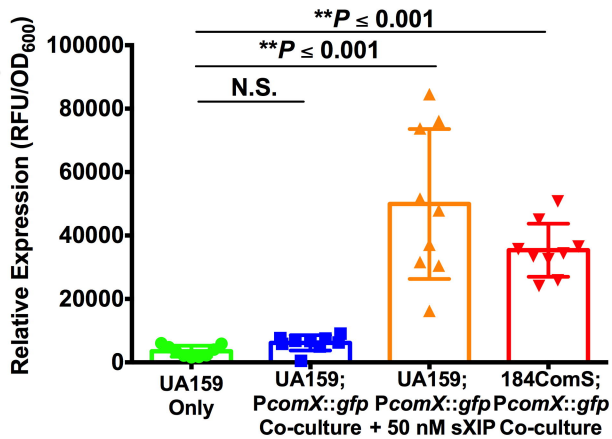

**A**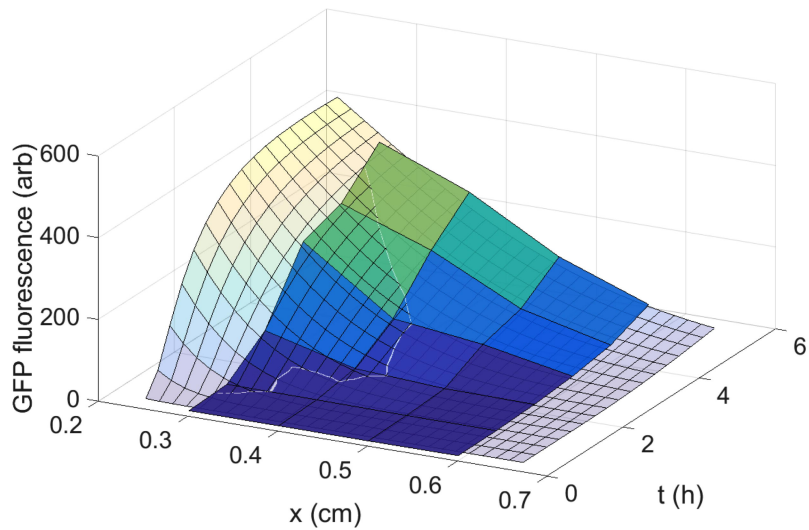**B**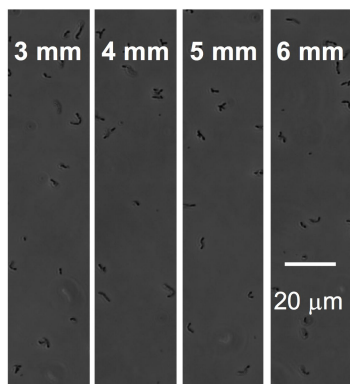**C**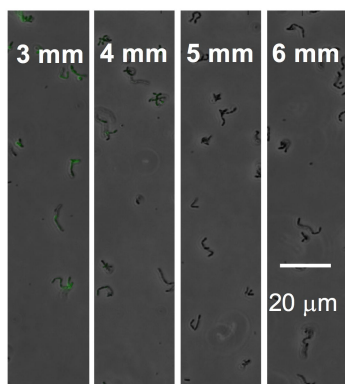**D**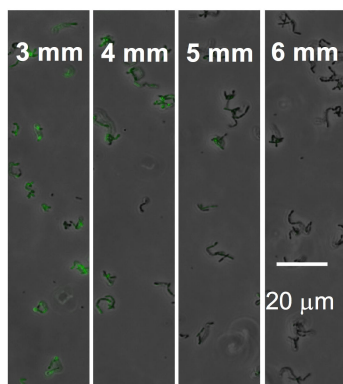

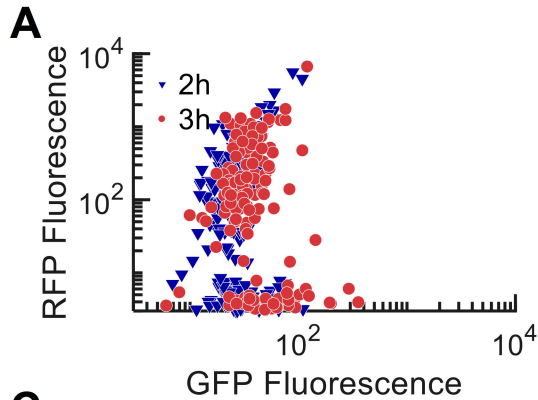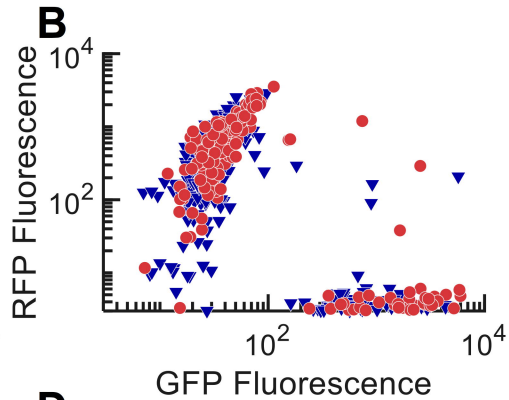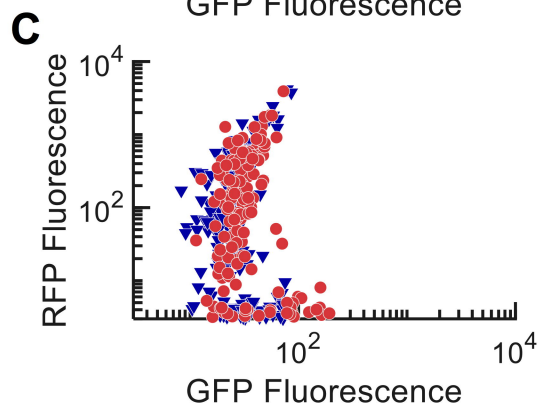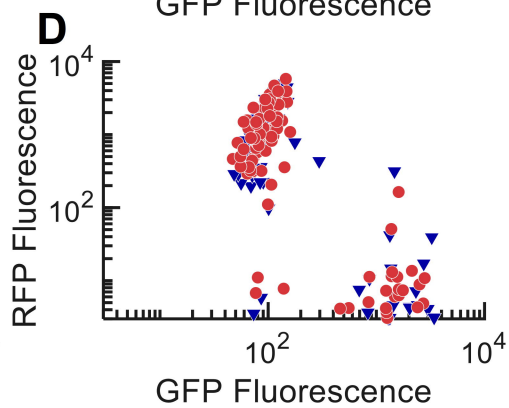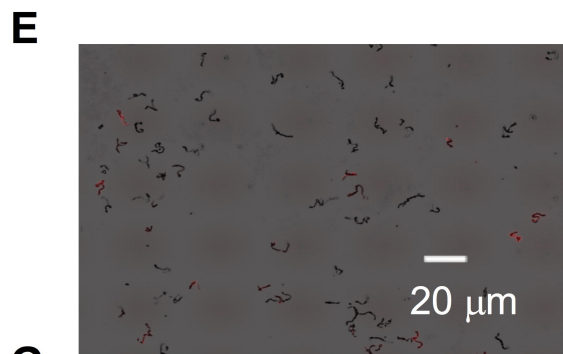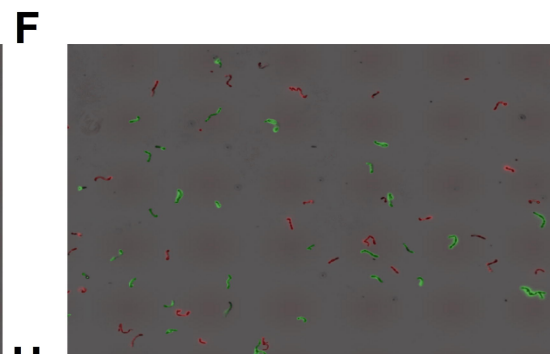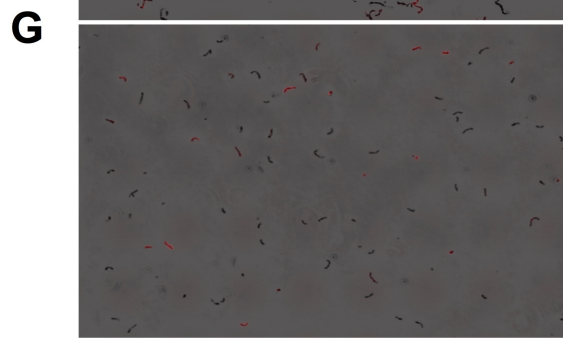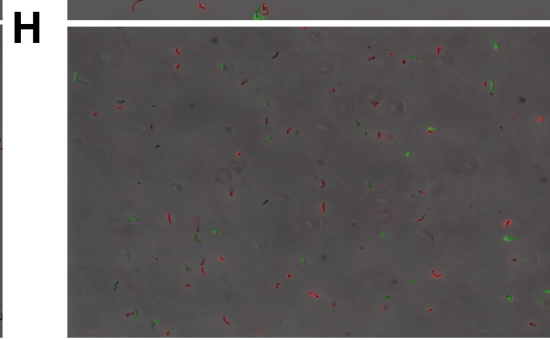

**A**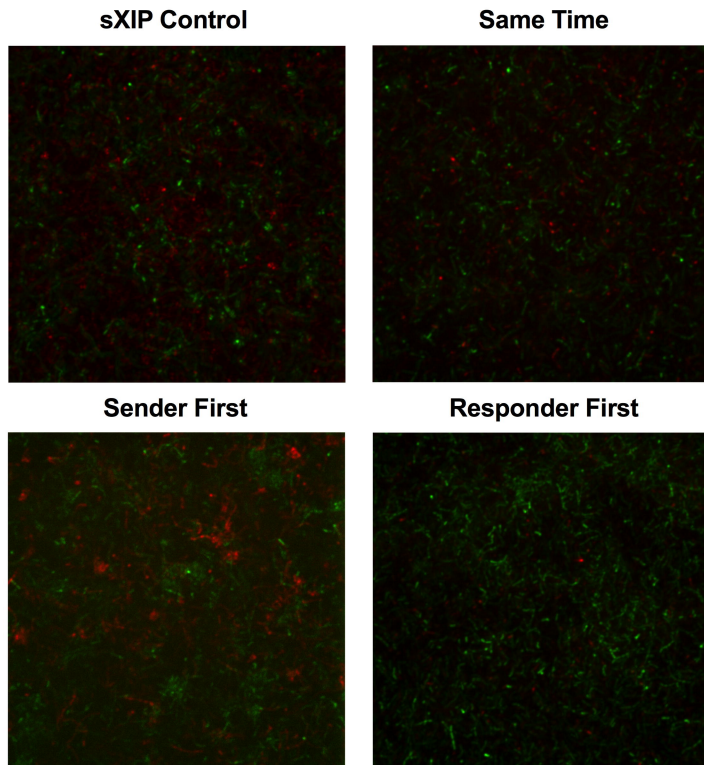**B**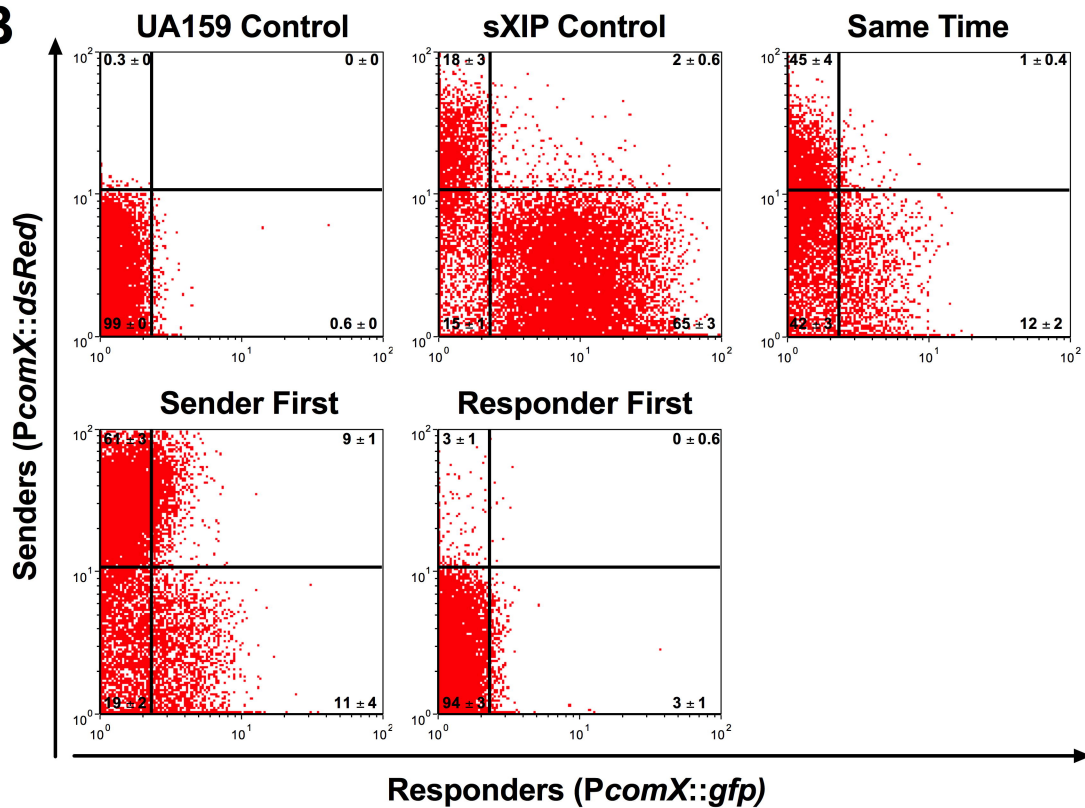



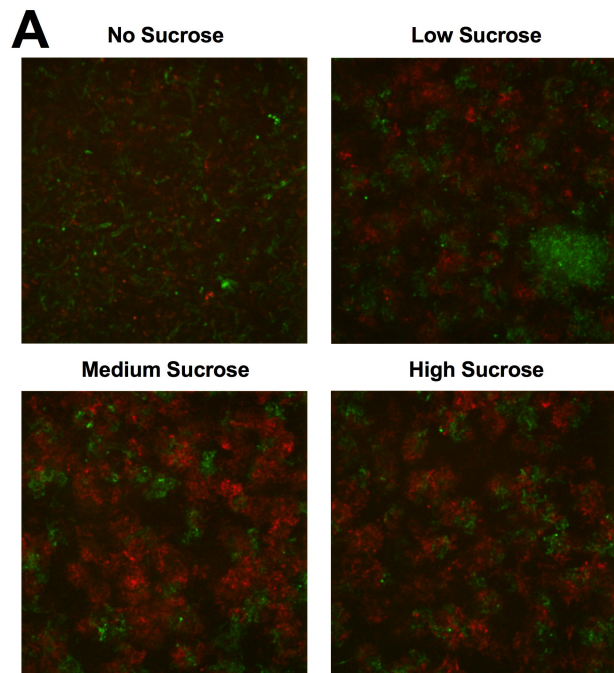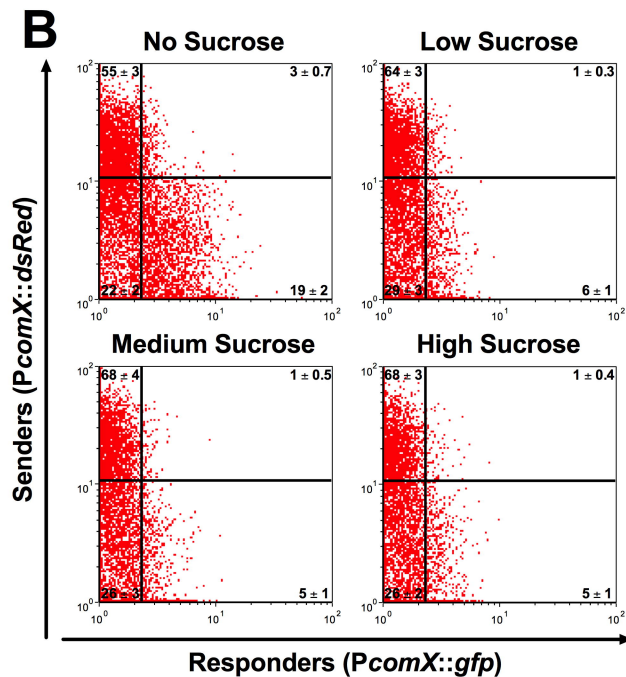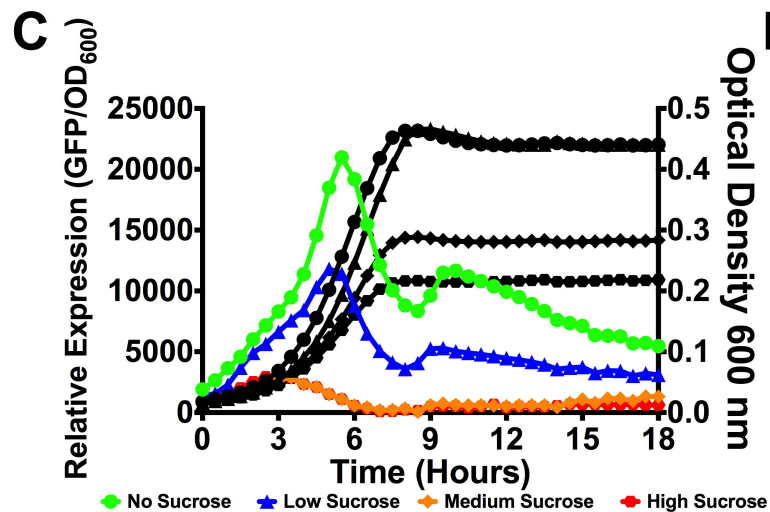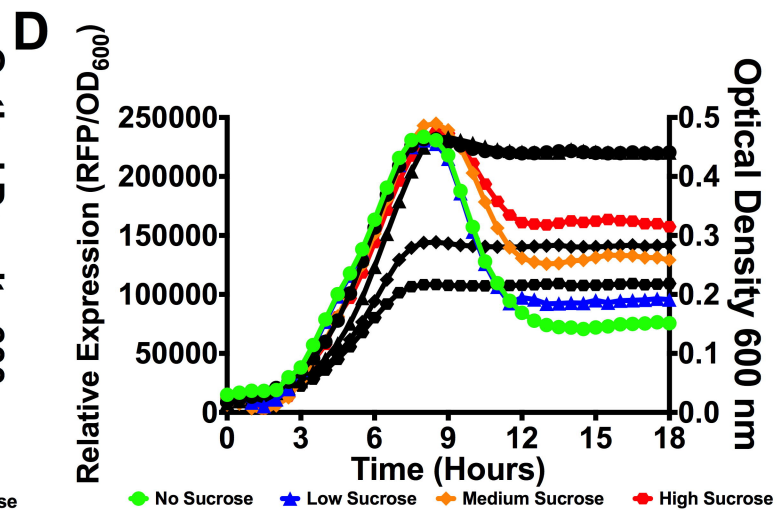

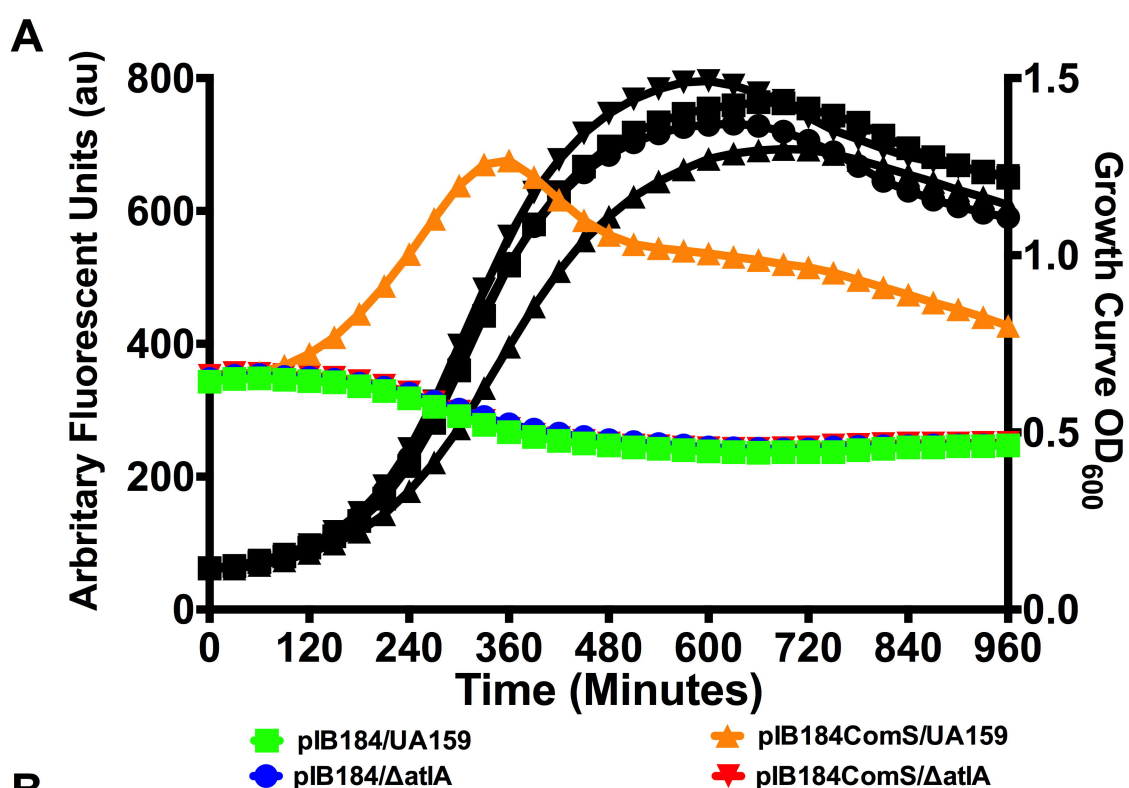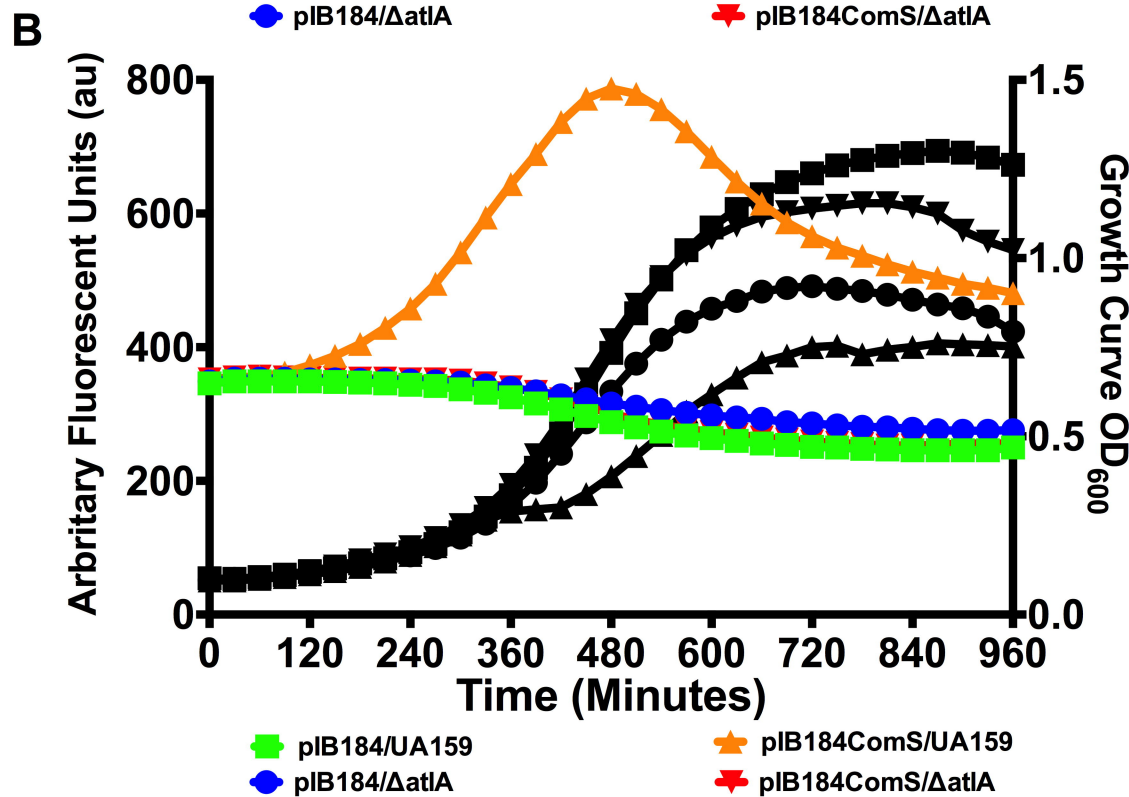

Source: https://www.biorxiv.org/content/10.1101/148320v2.full.pdf
